# Supplementary material for: Hydrogen production via aqueous-phase reforming of methanol catalyzed by ruthenium(ii) complexes with Schiff-base pincer ligands
Source: Royal Society of Chemistry journal article supplement (doi:10.1039/d5dt00387c), 2025-01-01
Supplement: d5dt00387c1.pdf [file d5dt00387c1.pdf]

## Supporting Information

### Hydrogen production via aqueous-phase reforming of methanol catalyzed by ruthenium(II) complexes with Schiff-base pincer ligands

*Chong Ma,<sup>a,†</sup> Yihao Xia,<sup>a,†</sup> Xue Ding,<sup>a</sup> Lei Qin<sup>\*,a,b</sup> and Zhiping Zheng<sup>\*,a,b</sup>*

<sup>a</sup> Department of Chemistry, Southern University of Science and Technology, Shenzhen, Guangdong, 518055, China.

<sup>b</sup> Shenzhen Grubbs Institute and Guangdong Provincial Key Laboratory of Catalysis, Southern University of Science and Technology, Shenzhen, 518055, China

<sup>†</sup> These authors contributed equally to this work.

## Contents

|                                                                                                                             |           |
|-----------------------------------------------------------------------------------------------------------------------------|-----------|
| <b>1. General procedures.....</b>                                                                                           | <b>4</b>  |
| <b>Figure S1.</b> The schematic presentation of the reaction apparatus.....                                                 | <b>5</b>  |
| <b>Figure S2.</b> GC analysis of the gas mixture from the aqueous-phase reforming of methanol catalyzed by <b>C4</b> . .... | <b>6</b>  |
| <b>2. Synthesis and Characterization .....</b>                                                                              | <b>7</b>  |
| <b>2.1 Synthesis of Pyridine-2,6-dicarbaldehyde. ....</b>                                                                   | <b>7</b>  |
| <b>Figure S3.</b> <sup>1</sup> H NMR spectrum of pyridine-2,6-dicarbaldehyde in CDCl <sub>3</sub> . ....                    | <b>7</b>  |
| <b>Figure S4.</b> <sup>13</sup> C NMR spectrum of pyridine-2,6-dicarbaldehyde in CDCl <sub>3</sub> . ....                   | <b>8</b>  |
| <b>2.2 Synthesis of 2,6-bis(isopropyliminomethyl)pyridine (L1) .....</b>                                                    | <b>8</b>  |
| <b>Figure S5.</b> <sup>1</sup> H NMR spectrum of 2,6-bis(isopropyliminomethyl)pyridine (L1) .....                           | <b>9</b>  |
| <b>Figure S6.</b> <sup>13</sup> C NMR spectrum of 2,6-bis(isopropyliminomethyl)pyridine (L1). ....                          | <b>9</b>  |
| <b>2.3 Synthesis of 2,6-bis(<i>N</i>-tert-butyliminomethyl)pyridine (L2). ....</b>                                          | <b>10</b> |
| <b>Figure S7.</b> <sup>1</sup> H NMR spectrum of 2,6-bis( <i>N</i> -tert-butyliminomethyl)pyridine (L2). ....               | <b>10</b> |
| <b>Figure S8.</b> <sup>13</sup> C NMR spectrum of 2,6-bis( <i>N</i> -tert-butyliminomethyl)pyridine (L2). ....              | <b>11</b> |
| <b>2.4 Synthesis of 2,6-bis(2,4,6-trimethylphenyliminomethyl)pyridine (L3). ...</b>                                         | <b>11</b> |
| <b>Figure S9.</b> <sup>1</sup> H NMR spectrum of 2,6-bis(2,4,6-trimethylphenyliminomethyl)pyridine (L3).....                | <b>12</b> |
| <b>Figure S10.</b> <sup>13</sup> C NMR spectrum of 2,6-bis(2,4,6-trimethylphenyliminomethyl)pyridine (L3).....              | <b>12</b> |
| <b>2.5 Synthesis of 2,6-bis(2,6-diisopropylphenyliminomethyl)pyridine (L4). ...</b>                                         | <b>13</b> |
| <b>Figure S11.</b> <sup>1</sup> H NMR spectrum of 2,6-bis(2,6-diisopropylphenyliminomethyl)pyridine (L4). ....              | <b>13</b> |
| <b>Figure S12.</b> <sup>13</sup> C NMR spectrum of 2,6-bis(2,6-diisopropylphenyliminomethyl)pyridine (L4). ....             | <b>14</b> |
| <b>2.6 Synthesis of [Ru(L1)Cl<sub>2</sub>(PPh<sub>3</sub>)] (C1). ....</b>                                                  | <b>14</b> |
| <b>Figure S13.</b> <sup>1</sup> H NMR spectrum [Ru(L1)Cl <sub>2</sub> (PPh <sub>3</sub> )] (C1). ....                       | <b>15</b> |
| <b>Figure S14.</b> <sup>31</sup> P NMR spectrum [Ru(L1)Cl <sub>2</sub> (PPh <sub>3</sub> )] (C1).....                       | <b>15</b> |
| <b>Figure S15.</b> <sup>13</sup> C NMR spectrum [Ru(L1)Cl <sub>2</sub> (PPh <sub>3</sub> )] (C1). ....                      | <b>16</b> |
| <b>2.7 Synthesis of [Ru(L2)Cl<sub>2</sub>(PPh<sub>3</sub>)] (C2). ....</b>                                                  | <b>16</b> |
| <b>Figure S16.</b> <sup>1</sup> H NMR spectrum [Ru(L2)Cl <sub>2</sub> (PPh <sub>3</sub> )] (C2). ....                       | <b>17</b> |
| <b>Figure S17.</b> <sup>31</sup> P NMR spectrum [Ru(L2)Cl <sub>2</sub> (PPh <sub>3</sub> )] (C2).....                       | <b>17</b> |
| <b>Figure S18.</b> <sup>13</sup> C NMR spectrum [Ru(L2)Cl <sub>2</sub> (PPh <sub>3</sub> )] (C2). ....                      | <b>18</b> |
| <b>2.8 Synthesis of [Ru(L3)Cl<sub>2</sub>(PPh<sub>3</sub>)] (C3). ....</b>                                                  | <b>18</b> |
| <b>Figure S19.</b> <sup>1</sup> H NMR spectrum [Ru(L3)Cl <sub>2</sub> (PPh <sub>3</sub> )] (C3). ....                       | <b>19</b> |
| <b>Figure S20.</b> <sup>31</sup> P NMR spectrum [Ru(L3)Cl <sub>2</sub> (PPh <sub>3</sub> )] (C3).....                       | <b>20</b> |
| <b>Figure S21.</b> <sup>13</sup> C NMR spectrum [Ru(L3)Cl <sub>2</sub> (PPh <sub>3</sub> )] (C3). ....                      | <b>20</b> |
| <b>Figure S22.</b> HRESI-MS data of <b>C3</b> . ....                                                                        | <b>21</b> |
| <b>2.9 Synthesis of [Ru(L4)Cl<sub>2</sub>(PPh<sub>3</sub>)] (C4). ....</b>                                                  | <b>21</b> |

|                                                                                                               |    |
|---------------------------------------------------------------------------------------------------------------|----|
| Figure S23. $^1\text{H}$ NMR spectrum $[\text{Ru}(\text{L4})\text{Cl}_2(\text{PPh}_3)]$ ( <b>C4</b> ). .....  | 22 |
| Figure S24. $^{31}\text{P}$ NMR spectrum $[\text{Ru}(\text{L4})\text{Cl}_2(\text{PPh}_3)]$ ( <b>C4</b> )..... | 23 |
| Figure S25. $^{13}\text{C}$ NMR spectrum $[\text{Ru}(\text{L4})\text{Cl}_2(\text{PPh}_3)]$ ( <b>C4</b> )..... | 23 |
| Figure S26. HRESI-MS data of <b>C4</b> . .....                                                                | 24 |
| <b>3. Catalytic experimental data</b> .....                                                                   | 25 |
| Figure S27. Optimization of reaction conditions for APRM using <b>C4</b> . .....                              | 25 |
| <b>4. Catalytic mechanism analysis.</b> .....                                                                 | 26 |
| Figure S28. IR spectrum of reaction solution using <b>C1</b> .....                                            | 26 |
| Figure S29. IR spectrum of reaction solution using <b>C4</b> .....                                            | 26 |
| Figure S30. $^{31}\text{P}$ NMR spectrum of reaction solution using <b>C4</b> as catalyst. ..                 | 27 |
| Figure S31. $^{31}\text{P}$ NMR spectrum of reaction solution using <b>C1</b> as catalyst. ..                 | 27 |
| Figure S32. $^{31}\text{P}$ NMR spectrum of reaction solution using <b>C2</b> as catalyst. ..                 | 28 |
| Figure S33. $^{31}\text{P}$ NMR spectrum of reaction solution using <b>C3</b> as catalyst. ..                 | 28 |
| Figure S34. $^1\text{H}$ NMR spectrum of reaction solution using <b>C1</b> as catalyst. ....                  | 29 |
| Figure S35. $^1\text{H}$ NMR spectrum of reaction solution using <b>C4</b> as catalyst. ....                  | 30 |
| <b>5. Crystallography Information</b> .....                                                                   | 30 |
| Figure S36. ORTEP diagrams of the molecular structures of <b>C3</b> .....                                     | 30 |
| Table S1. Crystal data and structure refinement for <b>C3</b> .....                                           | 31 |
| Table S2. Bond Lengths for <b>C3</b> . .....                                                                  | 32 |
| Table S3. Bond Angles for <b>C3</b> .....                                                                     | 33 |
| Figure S37. ORTEP diagrams of the molecular structures of <b>C4</b> .....                                     | 34 |
| Table S4. Crystal data and structure refinement for <b>C4</b> .....                                           | 35 |
| Table S5. Bond Lengths for <b>C4</b> . .....                                                                  | 36 |
| Table S6. Bond Angles for <b>C4</b> .....                                                                     | 37 |
| <b>6. Supporting references</b> .....                                                                         | 39 |

## 1. General procedures.

$^1\text{H}$  and  $^{31}\text{P}$  NMR spectroscopy were recorded using Bruker Ascend™ 400 MHz spectrometers. All NMR data are expressed as chemical shifts in ppm.  $^1\text{H}$  and  $^{13}\text{C}$  NMR chemical shifts were determined relative to the internal standard  $\text{CHCl}_3$  (7.26 ppm and 77.16 ppm, respectively) in  $\text{CDCl}_3$ , DMSO (2.50 ppm and 39.52 ppm, respectively) in  $d_6$ -DMSO or  $\text{H}_2\text{O}$  (4.79 ppm) in  $\text{D}_2\text{O}$ .  $^{31}\text{P}$  NMR spectra were calibrated with an external  $\text{H}_3\text{PO}_4$  standard (0 ppm). NMR spectra were interpreted and processed using MestReNova. Quantitative gas measurements were performed using a burette (500 mL or 1000 mL). Gas chromatography analyses were performed on an Agilent Technologies 7820A gas chromatograph with Ar carrier gas. The gas integration was calibrated using a single-point method by certified gas mixtures from commercial suppliers (Huateshen company) with the following gas volume:  $\text{H}_2$  (10%), CO (10 ppm),  $\text{CH}_4$  (1%),  $\text{CO}_2$  (1%). Elemental analyses were performed on an Elementar vario EL cube element analyzer. Fourier transform infrared (FT-IR) spectra were recorded on a Vertex 80 spectrometer. The single-crystal data of **C3** and **C4** were collected on a Bruker D8 VENTURE CCD diffractometer, using graphite monochromated Mo  $K\alpha$  radiation ( $\lambda = 0.71073 \text{ \AA}$ ). Cell parameters, data reduction, and absorption corrections were performed using Bruker SAINT and SADABS. Using Olex2,<sup>[S1]</sup> the structure was solved with the SHELXS<sup>[S2]</sup> structure solution program using direct methods and refined with the SHELXL<sup>[S3]</sup> refinement package using least squares minimization. All non-H atoms were refined anisotropic Ally.

**Calculation of the hydrogen volume and TON.** For the experiment data obtained using a gas burette, the turnover number (TON) was calculated based on the amount of hydrogen gas, meaning each produced hydrogen molecule represents one turnover number. In detail, the TON was calculated using the following equation:

$$TON = \frac{V_{obsved} - V_{blank}}{V_{m,H_2,22^\circ C} * n_{cat}}$$

$V_{obs}$ : measured gas volume from gas burette (mL)

$V_{blank}$ : the blank volume (mL)

$n_{cat}$ : amount of catalyst (mmol)

$V_{m,H_2,22^\circ C}$ : molar gas volume,  $V_{m,H_2,22^\circ C} = 24.2 \text{ mL/mmol}$  at  $22^\circ \text{C}$  calculated from the Van der Waals Equation:

$$V_{m,H_2,22^\circ C} = \frac{RT}{p} + b - \frac{a}{RT} = 24.2 \frac{\text{mL}}{\text{mmol}}$$

For hydrogen gas, the parameters are  $R = 8.3145 \text{ m}^3 \text{ Pa} \cdot \text{mol}^{-1} \cdot \text{K}^{-1}$ ,  $T = 298.15 \text{ K}$ ,  $p = 101325 \text{ Pa}$ ,  $a = 2.49 \cdot 10^{-10} \text{ Pa} \cdot \text{m}^3 \cdot \text{mol}^{-2}$ ,  $b = 26.7 \cdot 10^{-6} \text{ m}^3 \cdot \text{mol}^{-1}$ .

**General procedures for aqueous-phase methanol reforming (APMR) dehydrogenation reaction and gas composition analysis.** All the experiments were conducted under Ar atmosphere. A mixture of MeOH/H<sub>2</sub>O (10 mL) or pure methanol (10 mL) was added to a given amount of base, and the resulting solution was degassed with Ar gas before the following procedure. Then, the catalyst was added, and the mixture was rapidly heated to the target temperature. The gas evolution values  $V_{\text{observed}}$  were measured by 1000 mL or 500 mL gas burette. Moreover, the corresponding blank values  $V_{\text{blank}}$  were also calculated without the addition of catalyst. The difference ( $V_{\text{observed}} - V_{\text{blank}}$ ) is the volume of the gas generated due to the action of the catalyst. After a certain reaction time, 1 mL of gas was extracted for the GC test to confirm the gas composition and the ratio of different compositions.

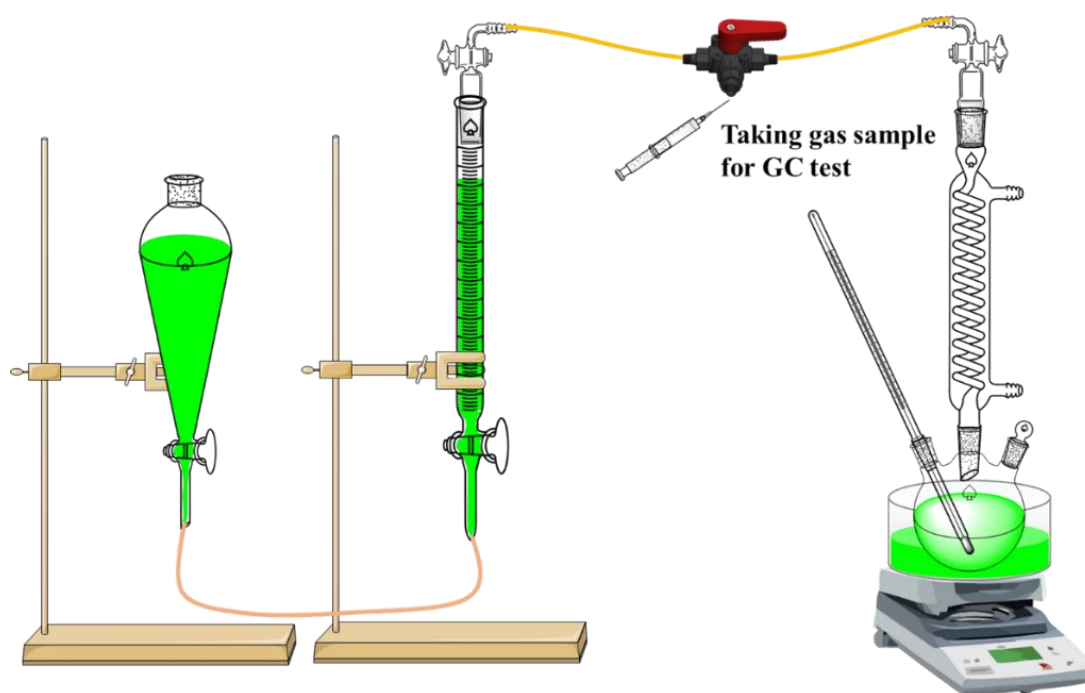

**Figure S1.** The schematic presentation of the reaction apparatus.

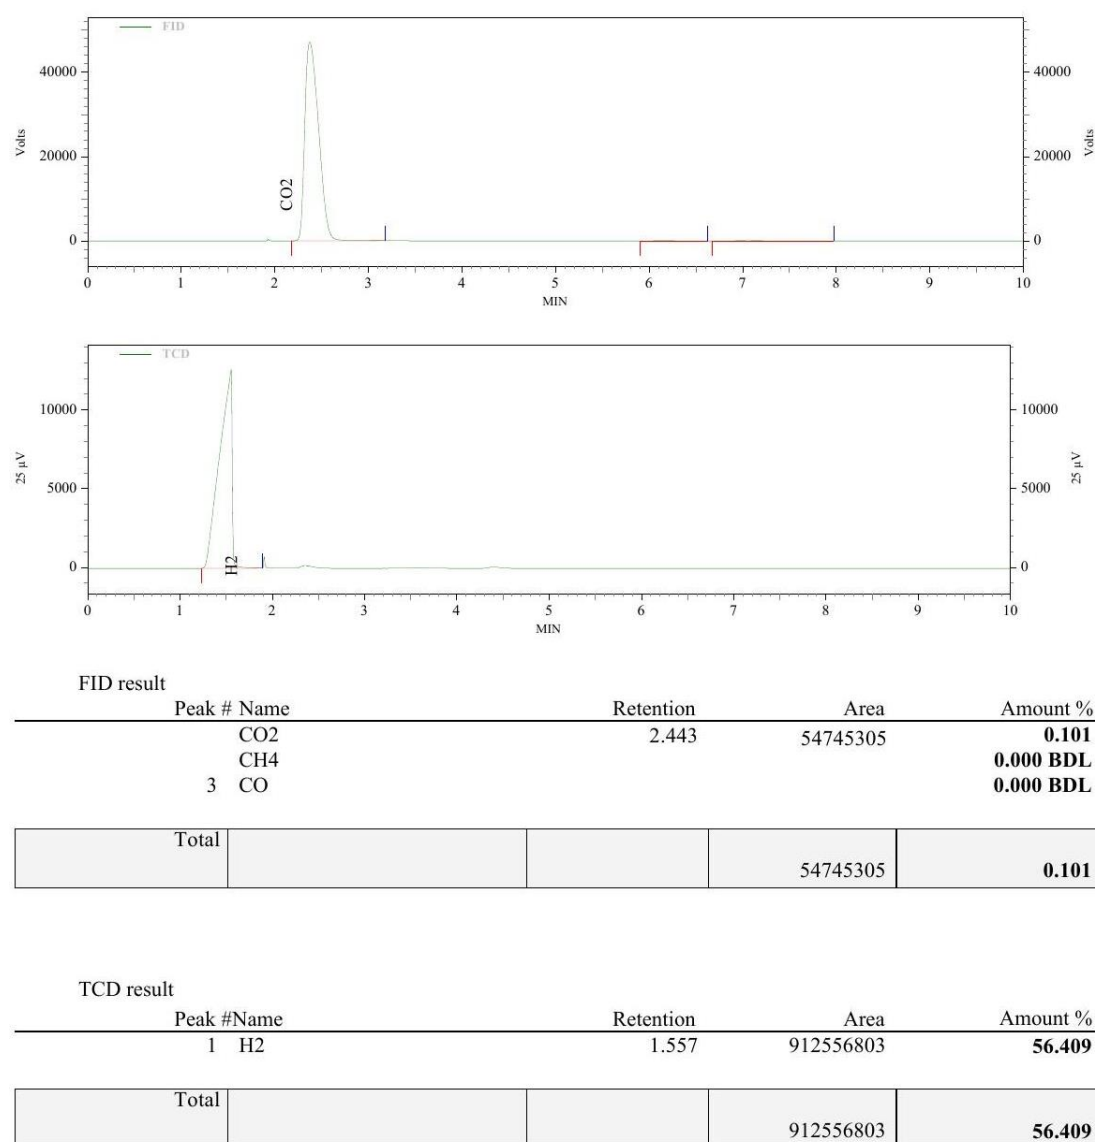

**Figure S2.** GC analysis of the gas mixture from the aqueous-phase reforming of methanol catalyzed by **C4**. Reaction conditions:  $n_{\text{cat}} = 3 \mu\text{mol}$ ,  $n_{\text{KOH}} = 80 \text{ mmol}$ ,  $T_{\text{set}} = 130 \text{ }^{\circ}\text{C}$ ,  $V = 10 \text{ mL}$  (MeOH/H<sub>2</sub>O = 9/1, v/v).

## 2. Synthesis and Characterization

### 2.1 Synthesis of Pyridine-2,6-dicarbaldehyde.

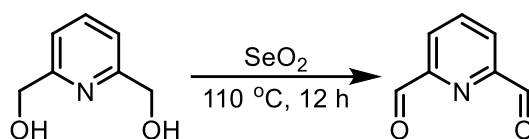

Pyridine-2,6-dicarbaldehyde was synthesized according to a method described in the literature.<sup>S4</sup> SeO<sub>2</sub> (1.11 g, 10 mmol) was added to pyridine-2,6-diylmethanol (1.39 g, 10 mmol) in dioxane (50 mL) under an argon atmosphere. The reaction mixture was refluxed with stirring at 100 °C for 12 hours. After completion, the solvent was removed via rotary evaporation. The residue was dissolved in minimal chloroform and eluted through a short silica gel column. The crystalline light brown 2,6-pyridinedicarboxaldehyde (1.15 g, 85% yield) was isolated after the evaporation of ethyl acetate. Anal. Calc. for C<sub>7</sub>H<sub>5</sub>NO<sub>2</sub>: C, 62.22; H, 3.73; N, 10.37. Found: C, 62.31; H, 3.75; N, 10.22. <sup>1</sup>H NMR (400 MHz, CDCl<sub>3</sub>) δ 10.17 (s, 2H), 8.21–8.15 (m, 2H), 8.13–8.04 (m, 1H). <sup>13</sup>C NMR (101 MHz, CDCl<sub>3</sub>) δ 192.36, 153.03, 138.40, 125.34.

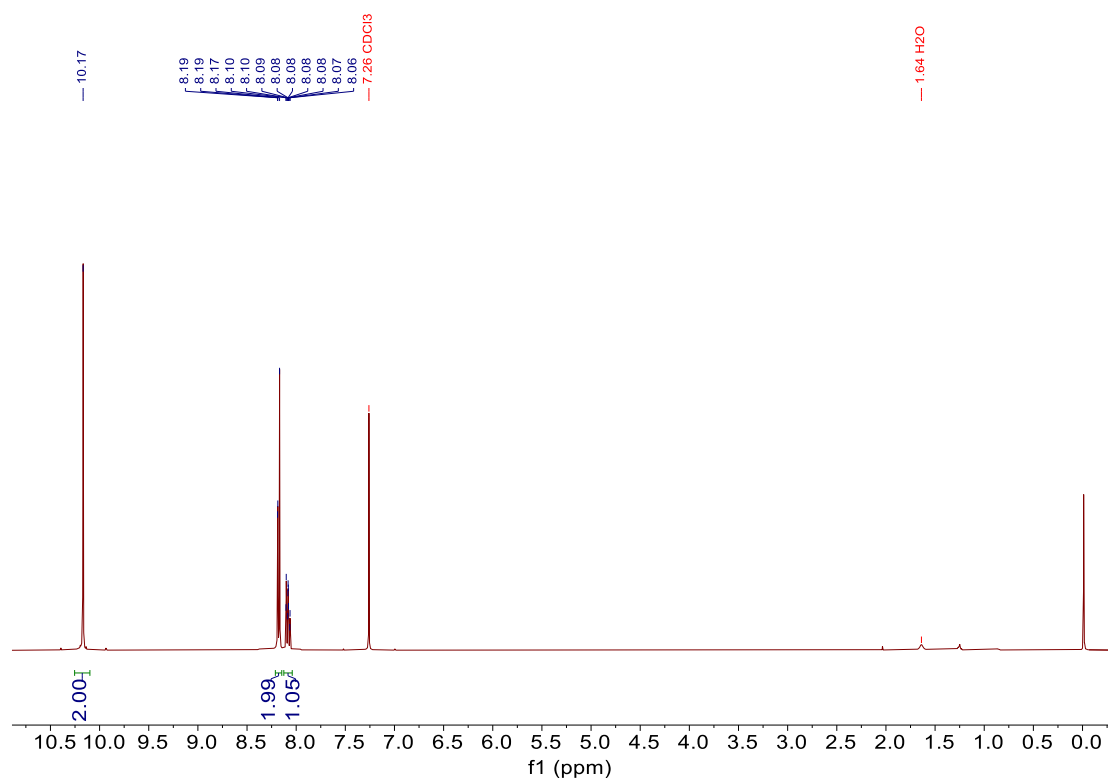

**Figure S3.** <sup>1</sup>H NMR spectrum of pyridine-2,6-dicarbaldehyde in CDCl<sub>3</sub>.

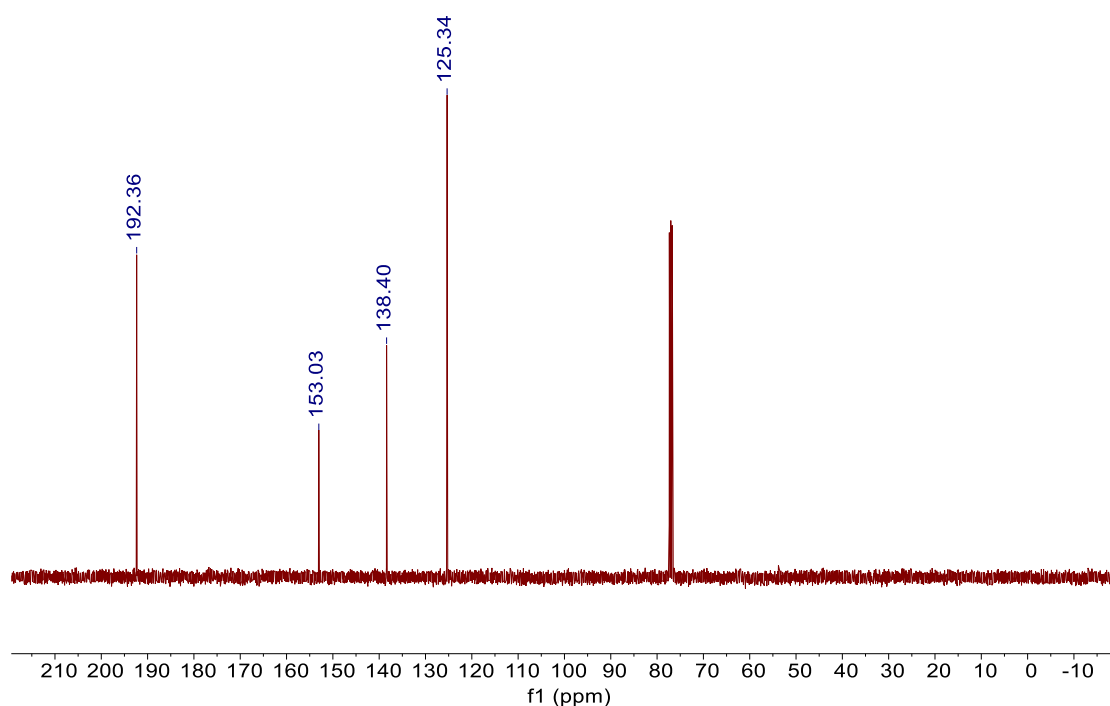

**Figure S4.**  $^{13}\text{C}$  NMR spectrum of pyridine-2,6-dicarbaldehyde in  $\text{CDCl}_3$ .

## 2.2 Synthesis of 2,6-bis(isopropyliminomethyl)pyridine (**L1**)

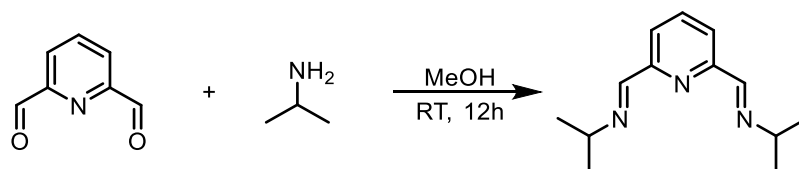

2,6-bis(isopropyliminomethyl)pyridine (**L1**) was synthesized following a previously described procedure in the literature.<sup>S4</sup> Isopropylamine (0.236 g, 4 mmol) was dissolved in methanol (20 mL), to which 2,6-pyridinedicarboxaldehyde (0.274 g, 2 mmol) and catalytic amounts of *p*-toluenesulfonyl chloride (2 mg, 10  $\mu\text{mol}$ ) were added. The mixture was refluxed for 6 hours, then filtered, and the solvent was evaporated. The remaining residue was extracted with hexane, and the reddish-brown oil of 2,6-bis(isopropyliminomethyl)pyridine (**L1**) (0.387 g, 89% yield) was obtained after the removal of hexane under vacuum.  $^1\text{H}$  NMR (400 MHz,  $\text{CDCl}_3$ )  $\delta$  8.42 (s, 2H), 8.01 (d,  $J = 7.7$  Hz, 2H), 7.76 (t,  $J = 7.8$  Hz, 1H), 3.64 (hept,  $J = 6.3$  Hz, 2H), 1.27 (d,  $J = 6.3$  Hz, 12H).  $^{13}\text{C}$  NMR (101 MHz,  $\text{CDCl}_3$ )  $\delta$  159.03, 154.54, 136.95, 122.07, 61.35, 23.93.



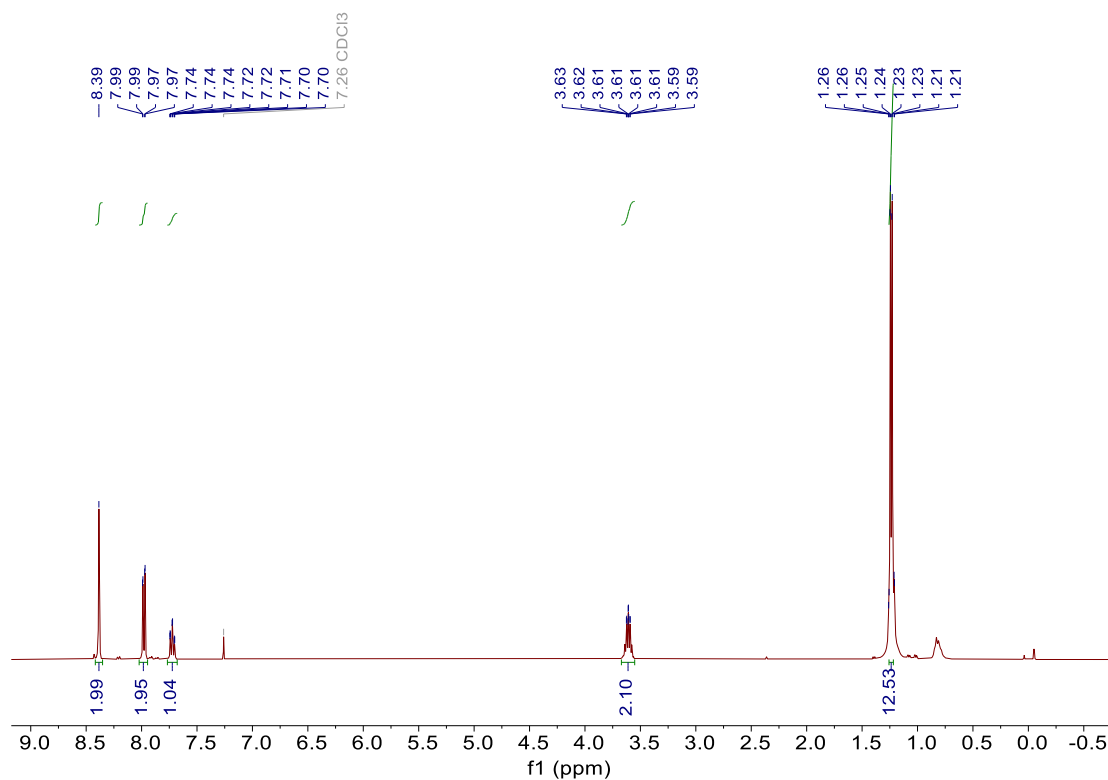

**Figure S5.** <sup>1</sup>H NMR spectrum of 2,6-bis(isopropyliminomethyl)pyridine (L1).

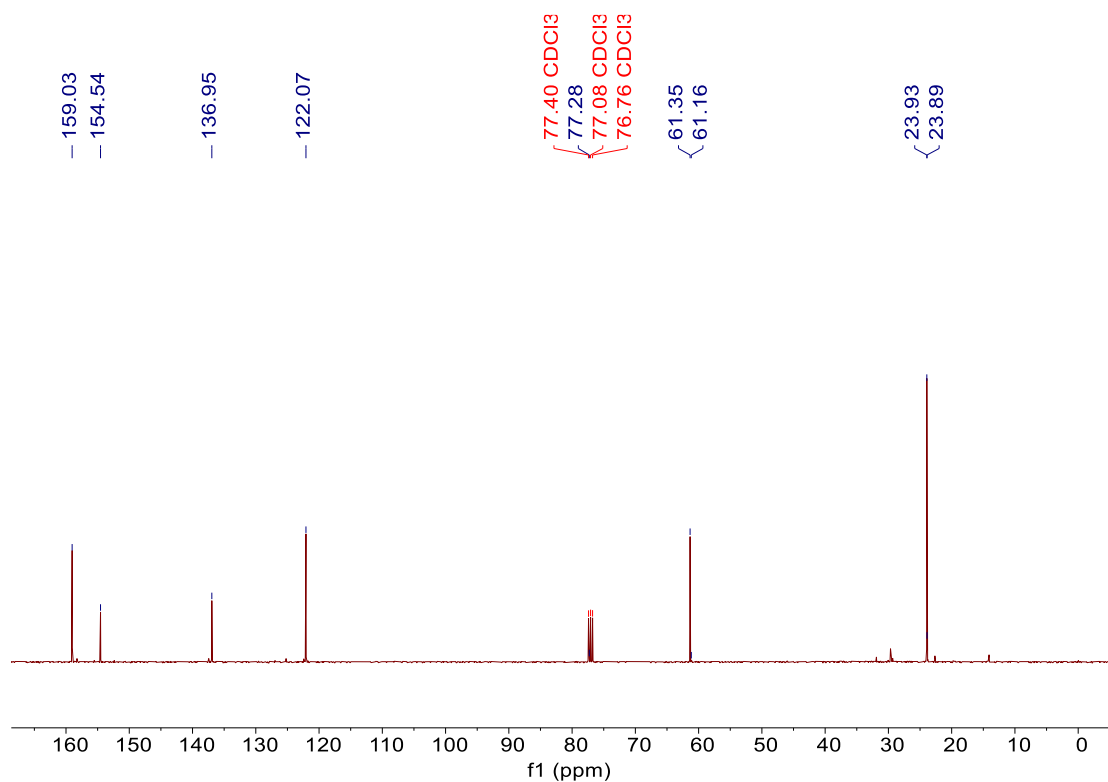

**Figure S6.** <sup>13</sup>C NMR spectrum of 2,6-bis(isopropyliminomethyl)pyridine (L1).

### 2.3 Synthesis of 2,6-bis(*N*-tert-butyliminomethyl)pyridine (**L2**).

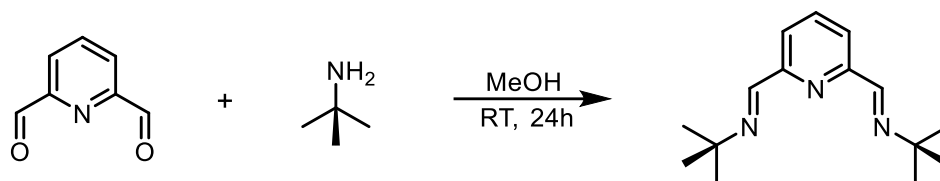

2,6-bis(*N*-tert-butyliminomethyl)pyridine (**L2**) was synthesized using a method similar to that of **L1**, with the substitution of tert-butylamine for isopropylamine.<sup>S4</sup> After refluxing and subsequent filtration, the residue was extracted with hexane. The reddish-brown oil of 2,6-bis(*N*-tert-butyliminomethyl)pyridine (**L2**) (0.416 g, 85% yield) was obtained following the removal of hexane under vacuum. <sup>1</sup>H NMR (400 MHz, CDCl<sub>3</sub>) δ 8.39 (s, 2H), 8.04 (d, *J* = 7.7 Hz, 2H), 7.76 (t, *J* = 7.8 Hz, 1H), 1.30 (s, 18H). <sup>13</sup>C NMR (101 MHz, CDCl<sub>3</sub>) δ 156.25, 155.11, 137.08, 121.69, 57.96, 29.62.

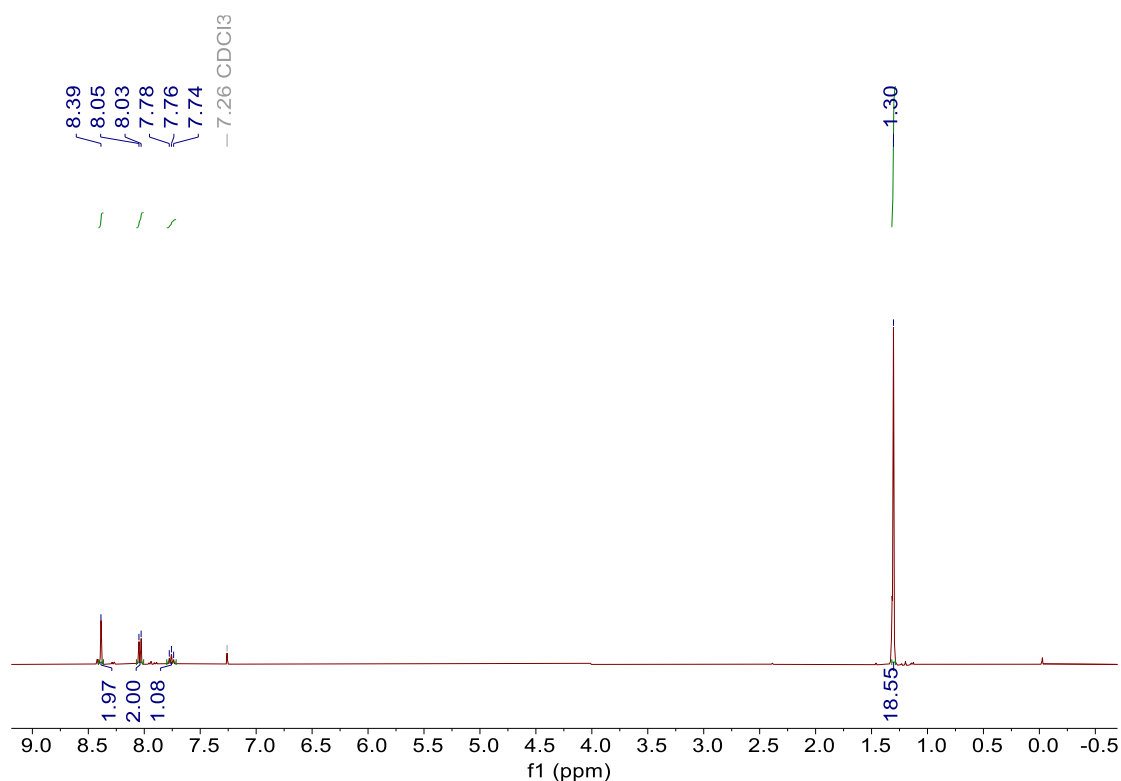

**Figure S7.** <sup>1</sup>H NMR spectrum of 2,6-bis(*N*-tert-butyliminomethyl)pyridine (**L2**).

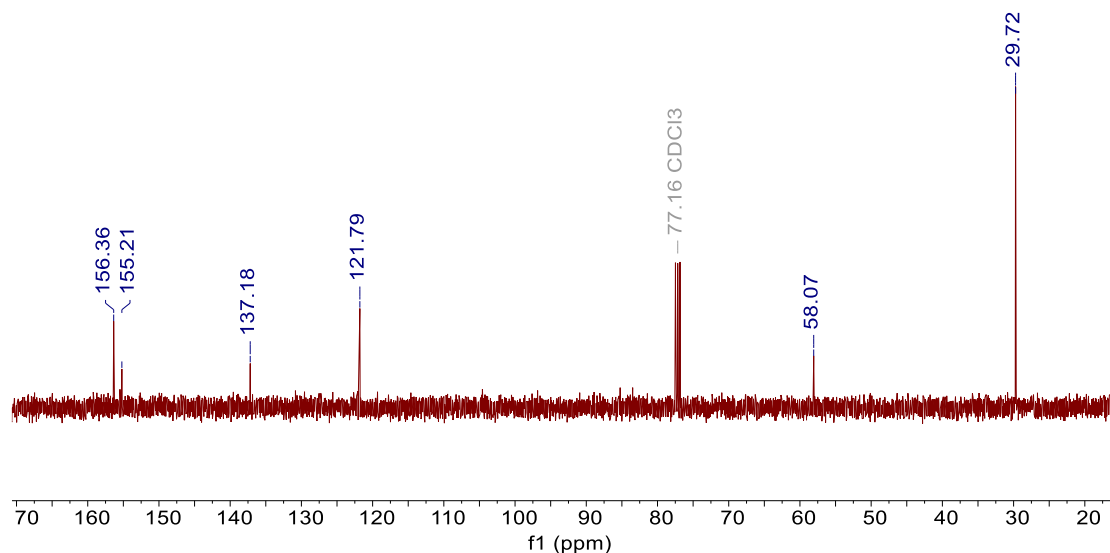

**Figure S8.**  $^{13}\text{C}$  NMR spectrum of 2,6-bis(*N*-tert-butyliminomethyl)pyridine (**L2**).

#### 2.4 Synthesis of 2,6-bis(2,4,6-trimethylphenyliminomethyl)pyridine (**L3**).

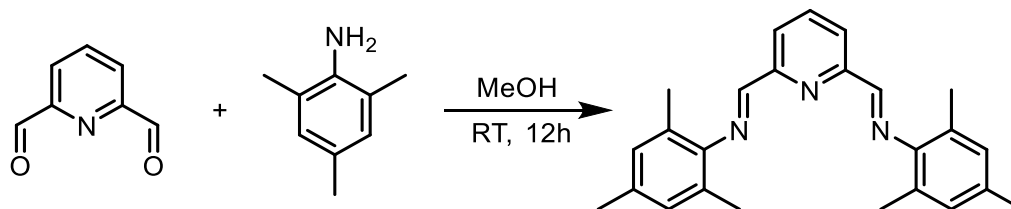

2,6-bis(2,4,6-trimethylphenyliminomethyl)pyridine (**L3**) was synthesized according to a procedure outlined in the literature.<sup>S5</sup> 2,4,6-trimethylaniline (0.135 g, 1 mmol) was dissolved in methanol (30 mL), to which pyridine-2,6-dicarbaldehyde (0.068 g, 0.5 mmol) and 5 drops of formic acid were added. The mixture was stirred at room temperature for 12 hours. After stirring, the solution was filtered, and the resultant golden yellow solid of 2,6-bis(2,4,6-trimethylphenyliminomethyl)pyridine (**L3**) (0.157 g, 85% yield) was obtained following washing with cold methanol and drying under vacuum.  $^1\text{H}$  NMR (400 MHz,  $\text{CDCl}_3$ )  $\delta$  8.41 – 8.37 (m, 4H), 7.97 (t,  $J = 7.8$  Hz, 1H), 6.92 (d,  $J = 1.2$  Hz, 4H), 2.31 (s, 6H), 2.17 (s, 12H).  $^{13}\text{C}$  NMR (101 MHz,  $\text{CDCl}_3$ )  $\delta$  163.15, 154.55, 147.82, 137.26, 133.54, 128.85, 126.81, 122.60, 77.25, 20.78, 18.28.

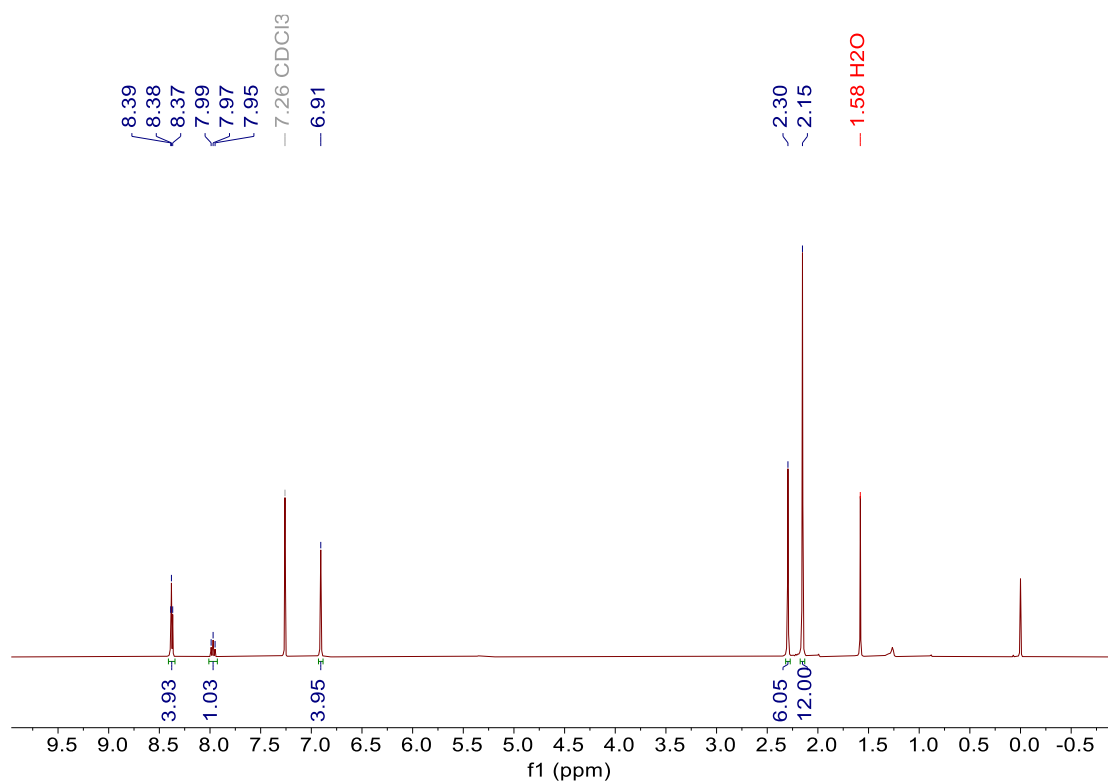

**Figure S9.** <sup>1</sup>H NMR spectrum of 2,6-bis(2,4,6-trimethylphenyliminomethyl)pyridine (L3).

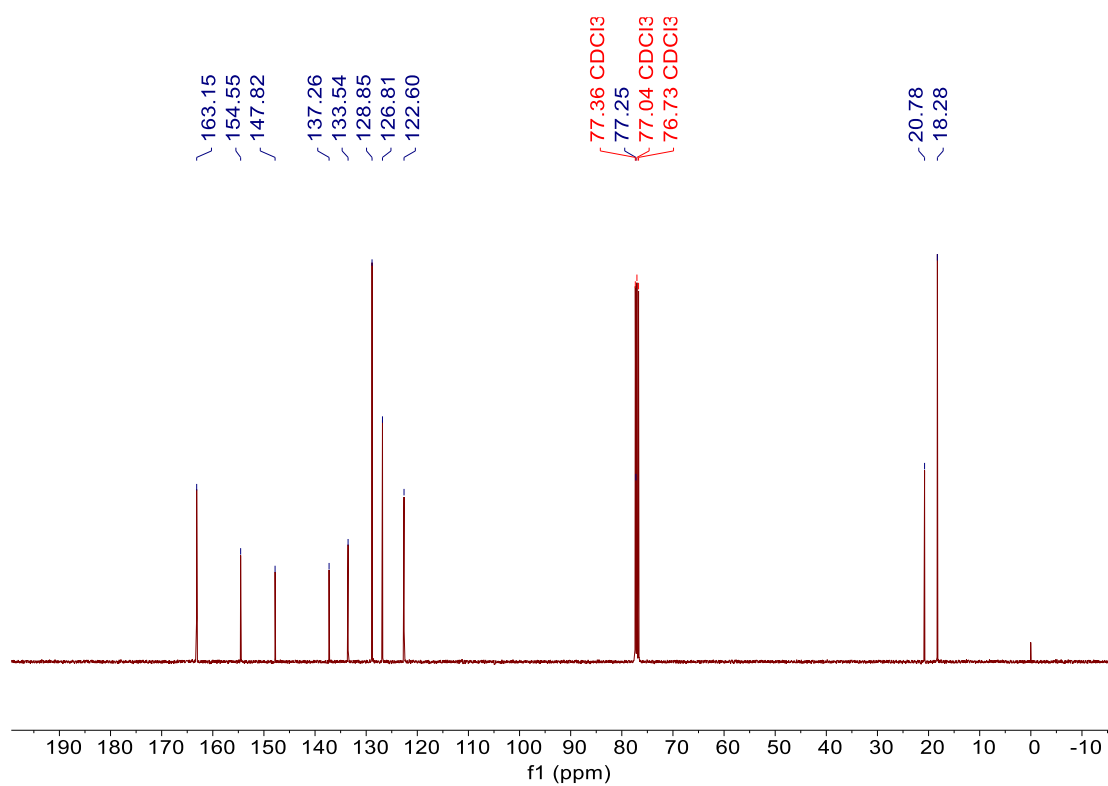

**Figure S10.** <sup>13</sup>C NMR spectrum of 2,6-bis(2,4,6-trimethylphenyliminomethyl)pyridine (L3).

## 2.5 Synthesis of 2,6-bis(2,6-diisopropylphenyliminomethyl)pyridine (L4).

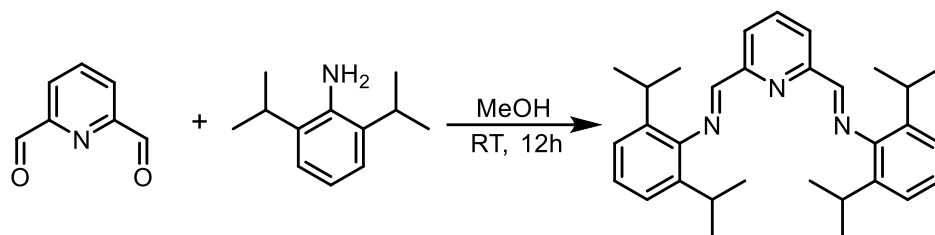

2,6-bis(2,6-diisopropylphenyliminomethyl)pyridine (**L4**) was synthesized following a method described in the literature.<sup>S6</sup> 2,6-diisopropylaniline (0.178 g, 1 mmol) was dissolved in methanol (30 mL), to which pyridine-2,6-dicarbaldehyde (0.068 g, 0.5 mmol) along with 5 drops of formic acid were added. The mixture was stirred at room temperature for 12 hours. Then, the solution was filtered and the resultant dark yellow solid of 2,6-bis(2,6-diisopropylphenyliminomethyl)pyridine (**L4**) (0.20 g, 88% yield) was obtained after washing with cold methanol and drying under vacuum. <sup>1</sup>H NMR (400 MHz, CDCl<sub>3</sub>) δ 8.44 – 8.34 (m, 4H), 8.06 – 7.94 (m, 1H), 7.22 – 7.10 (m, 6H), 3.00 (hept, *J* = 6.9 Hz, 4H), 1.20 (d, *J* = 6.8 Hz, 24H). <sup>13</sup>C NMR (101 MHz, CDCl<sub>3</sub>) δ 162.71, 154.46, 148.32, 137.37, 137.16, 124.55, 123.07, 122.77, 77.23, 28.01, 23.46.

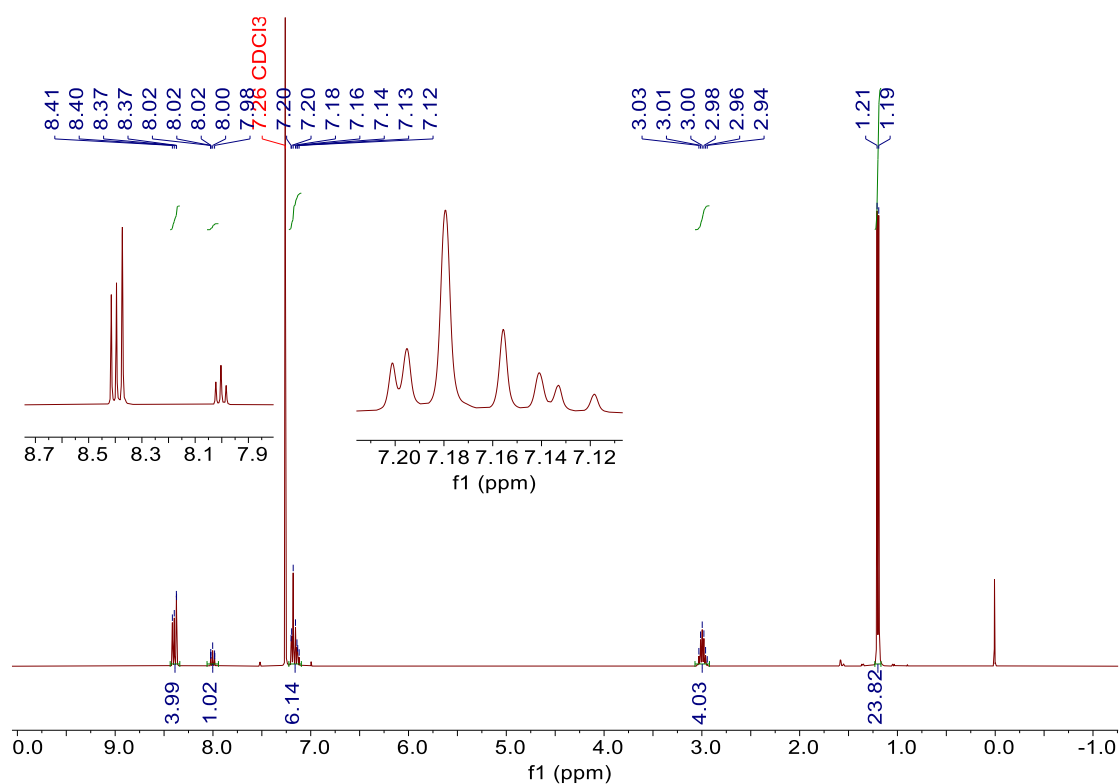

**Figure S11.** <sup>1</sup>H NMR spectrum of 2,6-bis(2,6-diisopropylphenyliminomethyl)pyridine (**L4**).

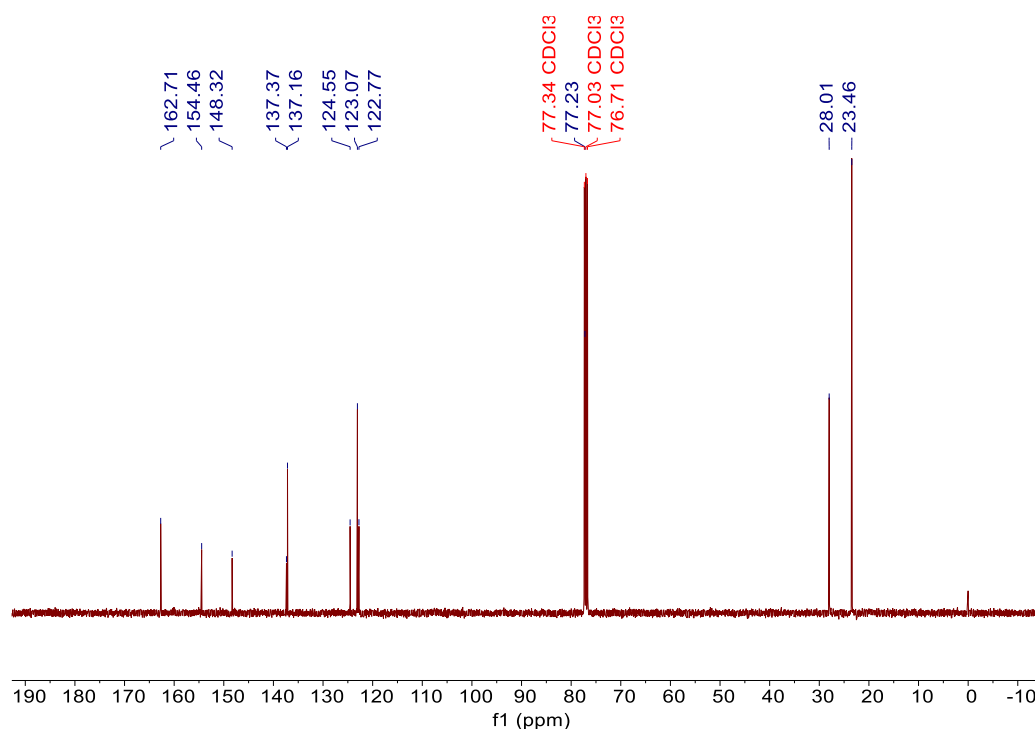

**Figure S12.** <sup>13</sup>C NMR spectrum of 2,6-bis(2,6-diisopropylphenyliminomethyl)pyridine (**L4**).

## 2.6 Synthesis of [Ru(**L1**)Cl<sub>2</sub>(PPh<sub>3</sub>)] (**C1**).

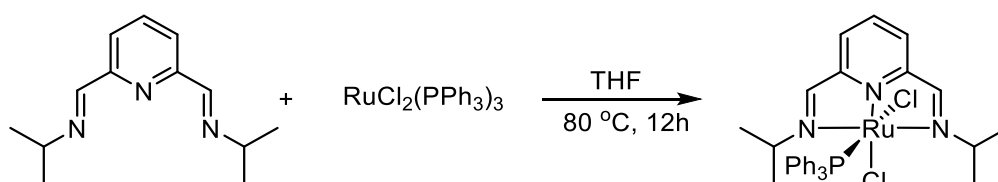

[Ru(**L1**)Cl<sub>2</sub>(PPh<sub>3</sub>)] (**C1**) was synthesized according to a procedure described in previous literature.<sup>S4</sup> 2,6-bis(isopropyliminomethyl)pyridine (**L1**) (0.0868 g, 0.4 mmol) and RuCl<sub>2</sub>(PPh<sub>3</sub>)<sub>3</sub> (0.2874 g, 0.3 mmol) were dissolved in anhydrous THF (20 mL) under an argon atmosphere. The mixture was refluxed for 12 hours, during which the color changed from violet to reddish-brown. Afterwards, the solvent was removed, and the residue was washed with diethyl ether (3×10 mL) and pentane (3×10 mL). The reddish-brown solid of [Ru(**L1**)Cl<sub>2</sub>(PPh<sub>3</sub>)] (**C1**) (0.156 g, 80% yield) was obtained after vacuum drying. Crystals suitable for X-ray analysis were produced by slowly diffusing pentane (4 mL) into a dichloromethane solution (2 mL) of **C1** (20 mg). Anal. Calc. for C<sub>31</sub>H<sub>34</sub>Cl<sub>2</sub>N<sub>3</sub>PRu·CH<sub>2</sub>Cl<sub>2</sub>: C, 52.19; H, 4.93; N, 5.71. Found: C, 52.24; H, 5.01; N, 5.76.

$^1\text{H}$  NMR (400 MHz,  $\text{CDCl}_3$ )  $\delta$  7.99 (s, 2H), 7.72–7.62 (m, 6H), 7.25–7.09 (m, 12H), 4.81 (p,  $J = 6.6$  Hz, 2H), 1.58 (d, 6H), 0.87 (d, 6H).  $^{31}\text{P}$  NMR (162 MHz,  $\text{CDCl}_3$ )  $\delta$  29.15.  $^{13}\text{C}$  NMR (101 MHz,  $\text{CDCl}_3$ )  $\delta$  162.22, 160.54, 132.59, 132.49, 131.98, 129.20, 128.28, 128.05, 127.96, 123.02, 77.25, 59.19, 25.44, 21.54.

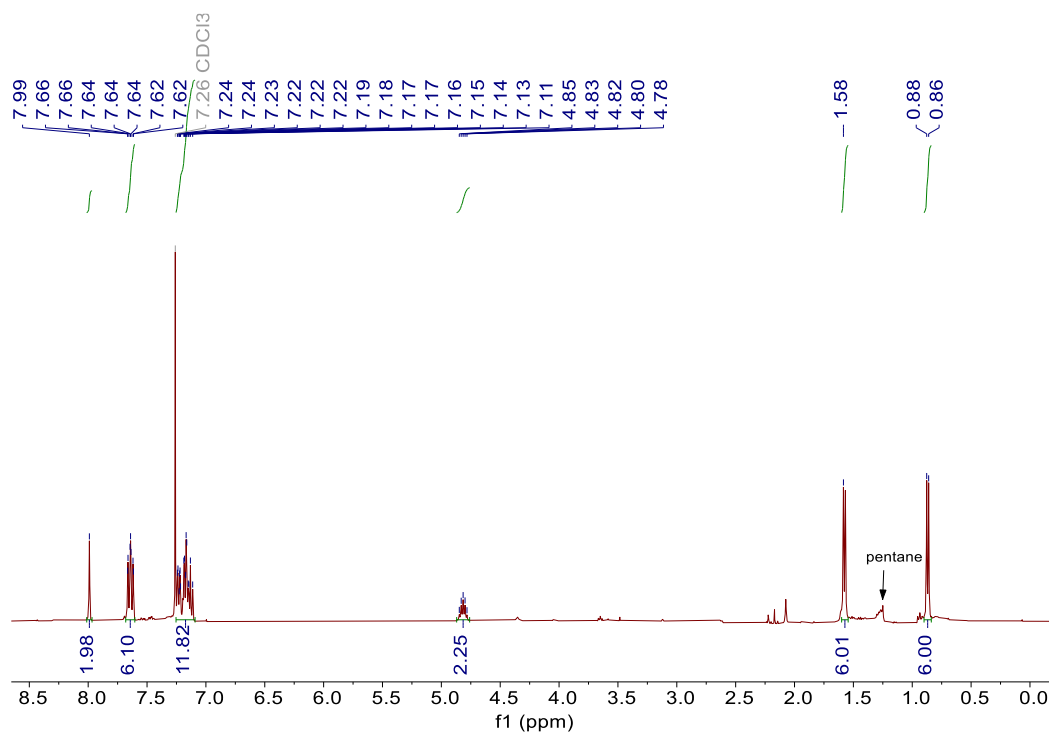

**Figure S13.**  $^1\text{H}$  NMR spectrum  $[\text{Ru}(\text{L1})\text{Cl}_2(\text{PPh}_3)]$  (C1).

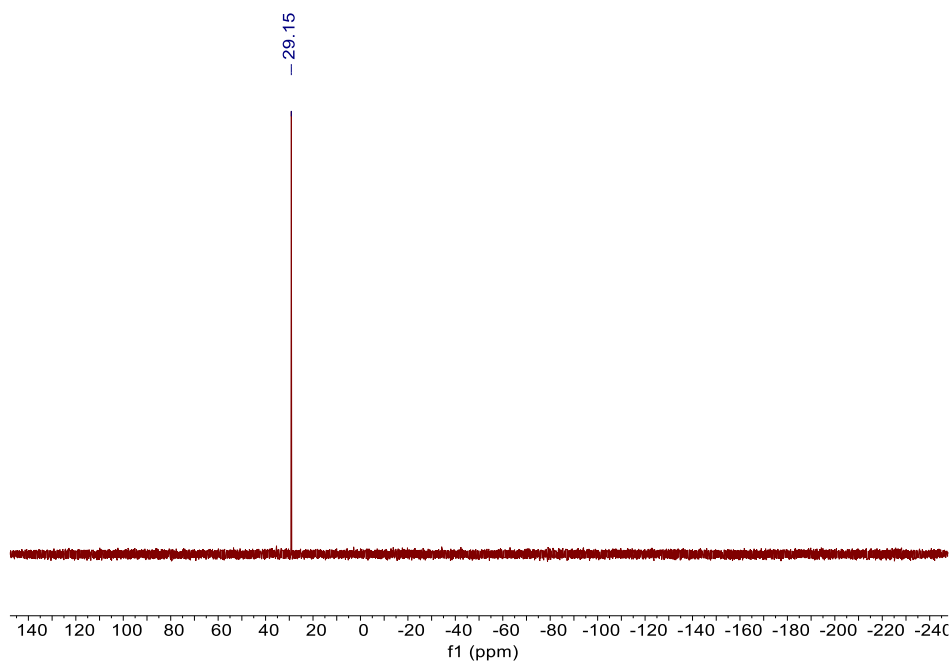

**Figure S14.**  $^{31}\text{P}$  NMR spectrum  $[\text{Ru}(\text{L1})\text{Cl}_2(\text{PPh}_3)]$  (C1).

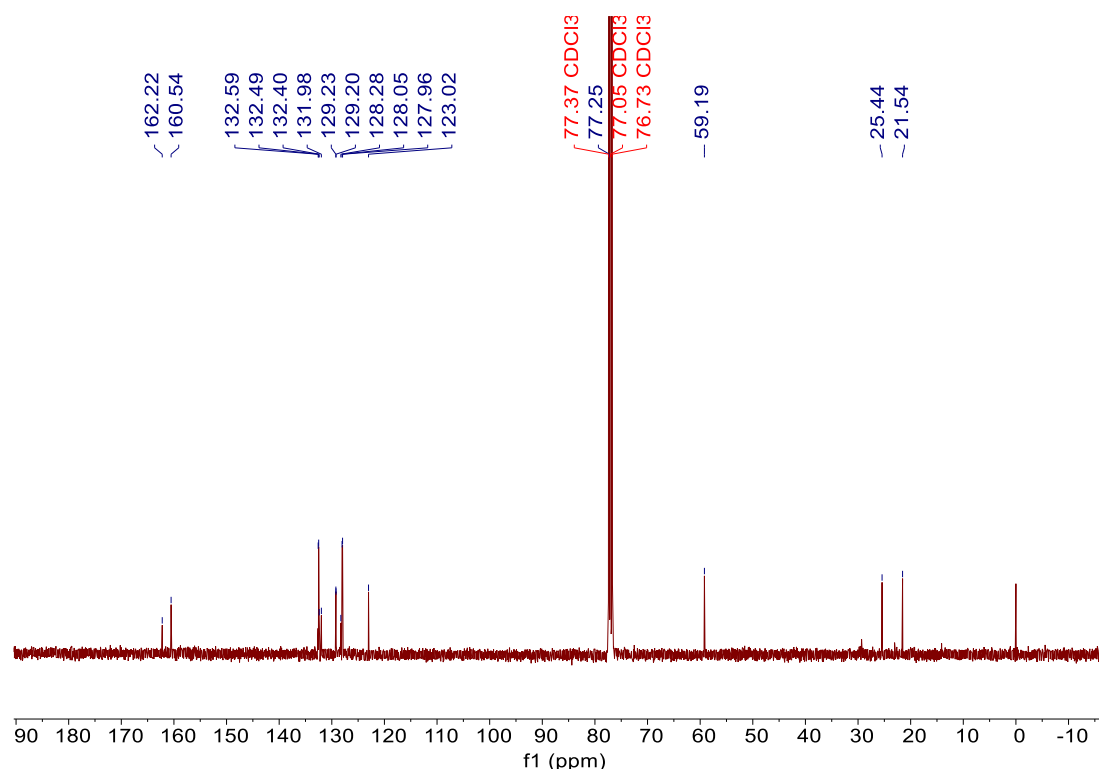

**Figure S15.**  $^{13}\text{C}$  NMR spectrum  $[\text{Ru}(\text{L1})\text{Cl}_2(\text{PPh}_3)]$  (**C1**).

## 2.7 Synthesis of $[\text{Ru}(\text{L2})\text{Cl}_2(\text{PPh}_3)]$ (**C2**).

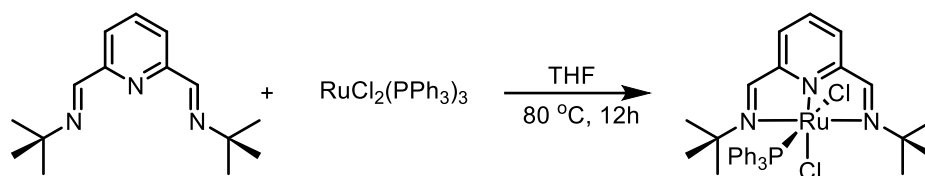

$[\text{Ru}(\text{L2})\text{Cl}_2(\text{PPh}_3)]$  (**C2**) was synthesized following a method described in previous literature.<sup>S6</sup> 2,6-bis(*N*-tert-butyliminomethyl)pyridine (**L2**) (0.098 g, 0.4 mmol) and  $\text{RuCl}_2(\text{PPh}_3)_3$  (0.2874 g, 0.3 mmol) were dissolved in anhydrous THF (20 mL) under an argon atmosphere. The mixture was refluxed for 12 hours, during which the color transitioned from violet to reddish-brown. After the reaction, the solvent was removed, and the residue was washed sequentially with diethyl ether ( $3 \times 10$  mL) and pentane ( $3 \times 10$  mL). The reddish-brown solid of  $[\text{Ru}(\text{L2})\text{Cl}_2(\text{PPh}_3)]$  (**C2**) (0.152 g, 78% yield) was obtained following vacuum drying. Anal. Calc. for  $\text{C}_{33}\text{H}_{38}\text{Cl}_2\text{N}_3\text{PRu} \cdot \text{C}_5\text{H}_{12}$ : C, 60.71; H, 6.70; N, 5.59. Found: C, 60.82; H, 6.75; N, 5.64.  $^1\text{H}$  NMR (400 MHz,  $\text{CDCl}_3$ )  $\delta$  7.93 (s, 1H), 7.80 (s, 1H), 7.76 – 7.29 (m, 6H), 7.21 – 6.89 (m, 10H), 6.71 (d,  $J = 7.6$  Hz, 2H), 2.70 (dq,  $J = 14.9, 7.4$  Hz, 2H), 2.17 (dq,  $J = 15.1, 7.5$  Hz, 2H), 1.68 (s, 6H),



0.91 (t,  $J = 7.5$  Hz, 8H).  $^{31}\text{P}$  NMR (162 MHz,  $\text{CDCl}_3$ )  $\delta$  23.84.  $^{13}\text{C}$  NMR (101 MHz,  $\text{CDCl}_3$ )  $\delta$  171.02, 159.26, 152.31, 137.34, 134.97, 134.87, 134.67, 134.31, 132.81, 132.29, 132.19, 128.72, 128.57, 127.12, 126.78, 126.69, 126.61, 25.38, 22.47, 15.27, 14.20.

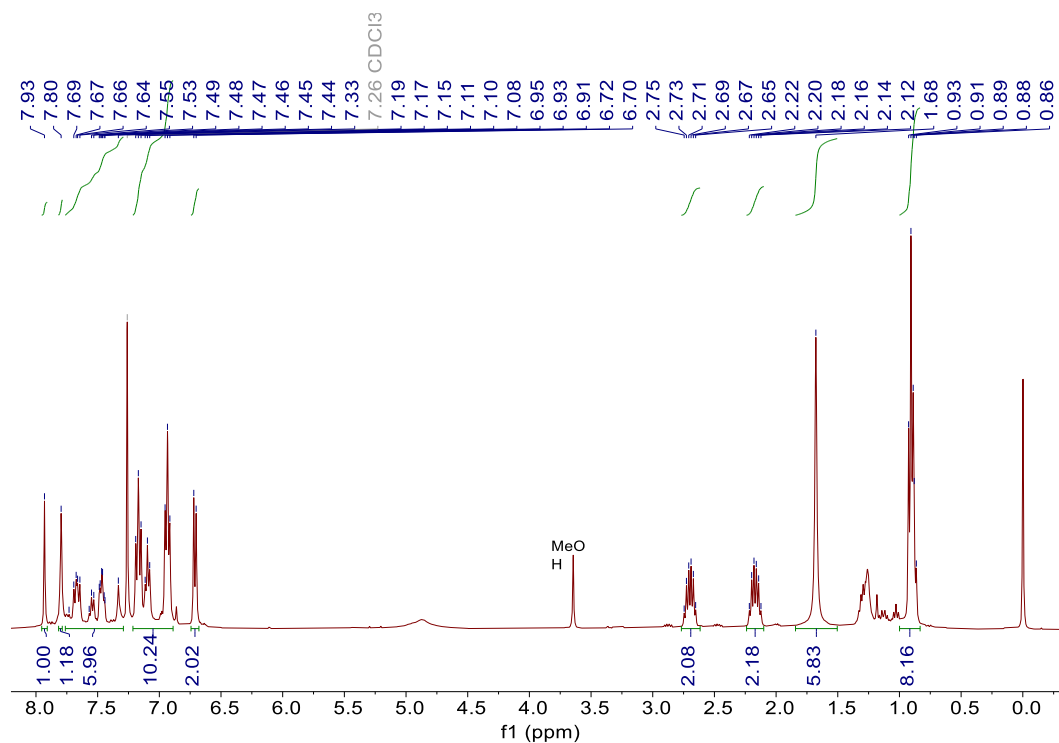

**Figure S16.**  $^1\text{H}$  NMR spectrum  $[\text{Ru}(\text{L2})\text{Cl}_2(\text{PPh}_3)]$  (C2).

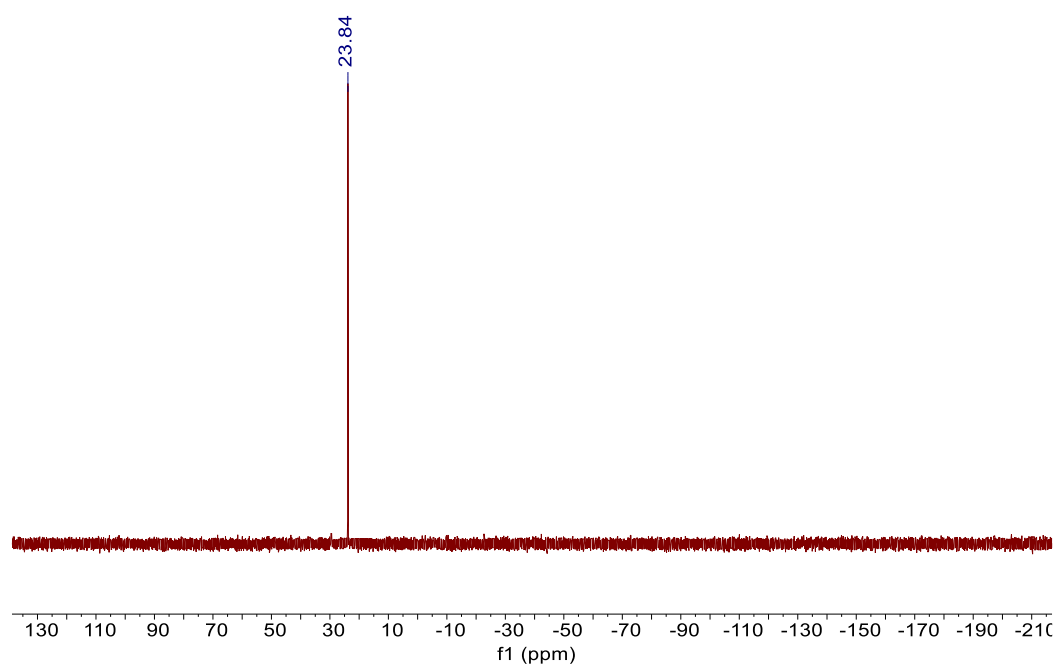

**Figure S17.**  $^{31}\text{P}$  NMR spectrum  $[\text{Ru}(\text{L2})\text{Cl}_2(\text{PPh}_3)]$  (C2).

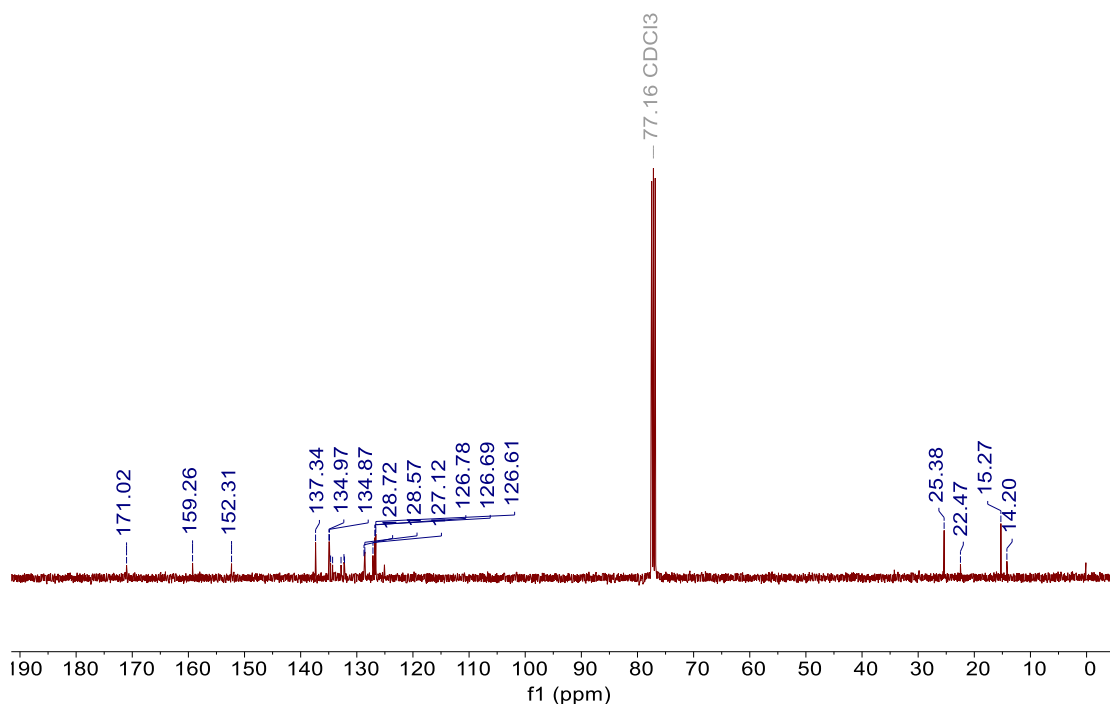

**Figure S18.**  $^{13}\text{C}$  NMR spectrum  $[\text{Ru}(\text{L2})\text{Cl}_2(\text{PPh}_3)]$  (**C2**).

## 2.8 Synthesis of $[\text{Ru}(\text{L3})\text{Cl}_2(\text{PPh}_3)]$ (**C3**).

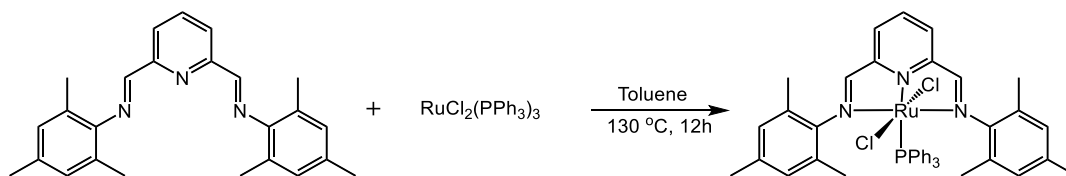

2,6-bis(2,4,6-trimethylphenyliminomethyl)pyridine (**L3**) (0.1107 g, 0.3 mmol) and  $\text{RuCl}_2(\text{PPh}_3)_3$  (0.2874 g, 0.3 mmol) were dissolved in anhydrous toluene (20 mL) under an argon atmosphere. The mixture was refluxed for 12 hours, during which the color remained dark violet. Then, the solvent was removed, and the residue was washed with diethyl ether ( $3 \times 10 \text{ mL}$ ) followed by pentane ( $3 \times 10 \text{ mL}$ ). A small amount of dichloromethane (5 mL) was added to dissolve the residue completely, then pentane (30 mL) was added dropwise under stirring. After filtering the solution, the dark violet solid of  $[\text{Ru}(\text{L3})\text{Cl}_2(\text{PPh}_3)]$  (**C3**) (0.157 g, 65% yield) was obtained following vacuum drying. Crystals suitable for X-ray analysis were produced by slow evaporation of a methanol solution (10 mL) containing 20 mg of **C3**. Anal. Calc. for  $\text{C}_{43}\text{H}_{42}\text{Cl}_2\text{N}_3\text{PRu} \cdot \text{CH}_3\text{OH}$ : C, 63.23; H, 5.55; N, 5.03. Found: C, 63.30; H, 5.62; N, 5.11.

$^1\text{H}$  NMR (400 MHz,  $\text{CDCl}_3$ )  $\delta$  7.95 (s, 2H), 7.82–7.75 (m, 4H), 7.28–7.24 (m, 5H), 7.19–7.14 (m, 3H), 7.02–6.96 (m, 6H), 6.45 (s, 4H), 2.15 (s, 6H), 1.97 (s, 12H).  $^{31}\text{P}$  NMR (162 MHz,  $\text{CDCl}_3$ )  $\delta$  23.73.  $^{13}\text{C}$  NMR (101 MHz,  $\text{CDCl}_3$ )  $\delta$  170.79, 170.76, 159.51, 151.35, 135.80, 135.07, 135.04, 134.94, 134.72, 133.97, 133.78, 132.70, 131.19, 129.34, 128.18, 128.16, 126.71, 126.62, 124.83, 124.81, 20.78, 20.61, 20.54. HRMS (ESI):  $m/z$  calculated for  $[\text{C}_{43}\text{H}_{42}\text{Cl}_2\text{N}_3\text{PRu}-\text{Cl}]^+$ : 768.1848; Found: 768.1847.

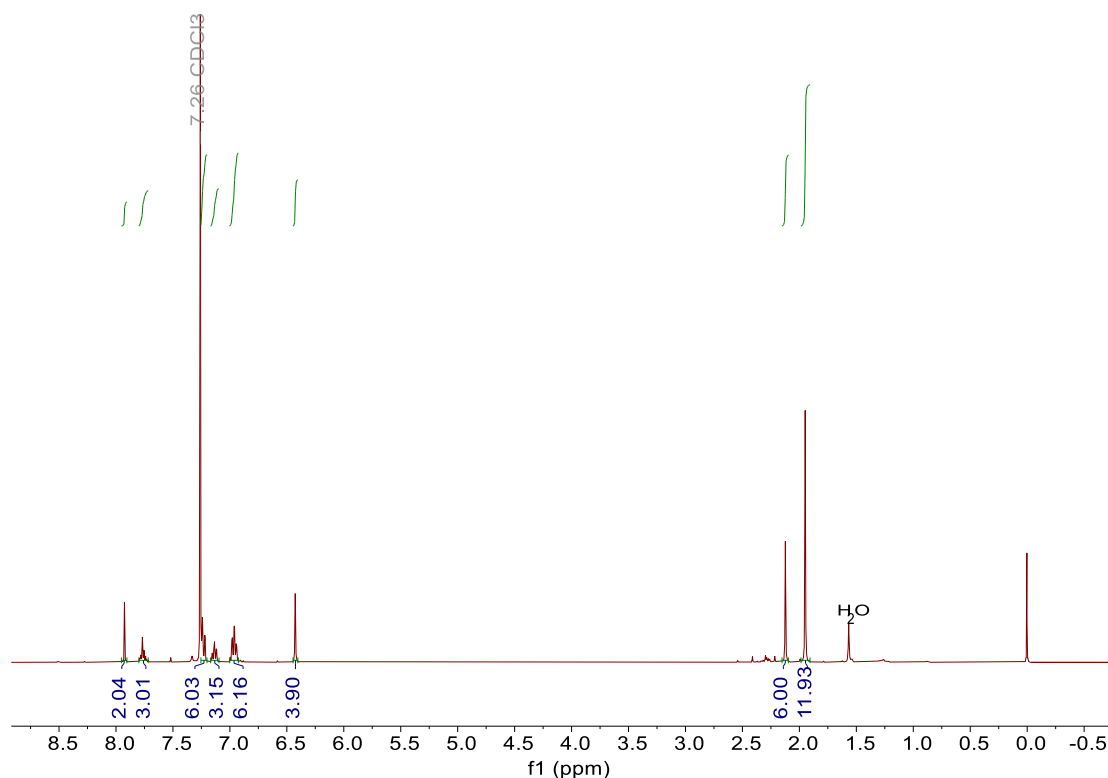

**Figure S19.**  $^1\text{H}$  NMR spectrum  $[\text{Ru}(\text{L3})\text{Cl}_2(\text{PPh}_3)]$  (C3).

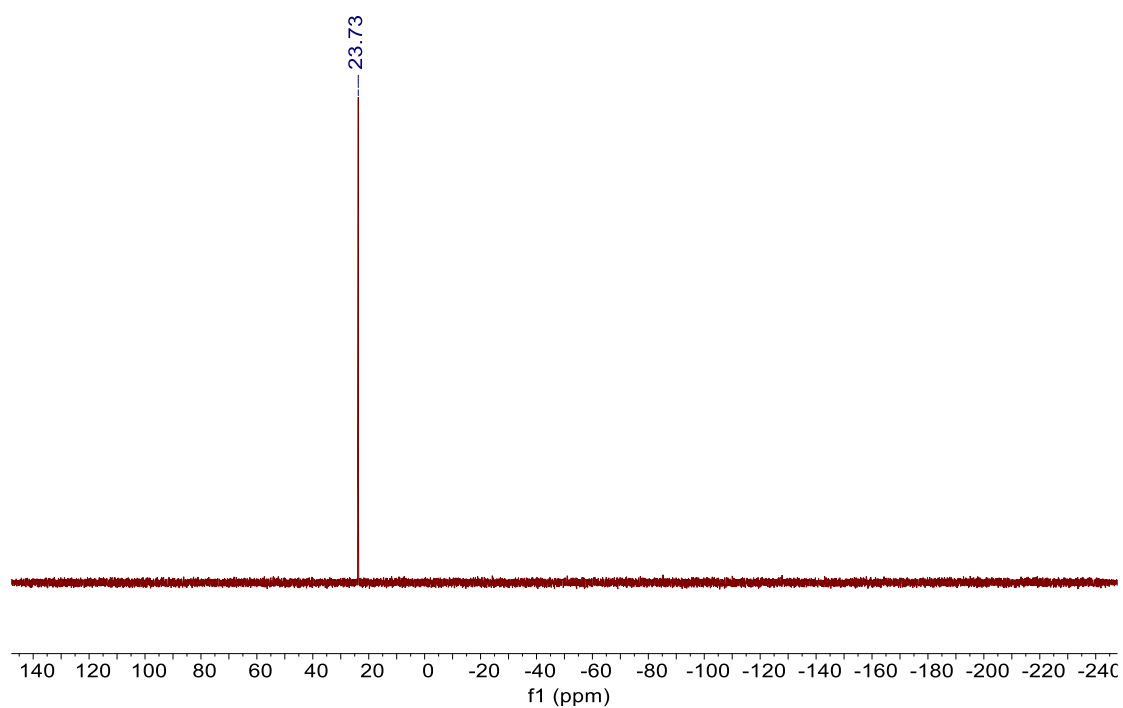

**Figure S20.** <sup>31</sup>P NMR spectrum [Ru(L3)Cl<sub>2</sub>(PPh<sub>3</sub>)] (C3).

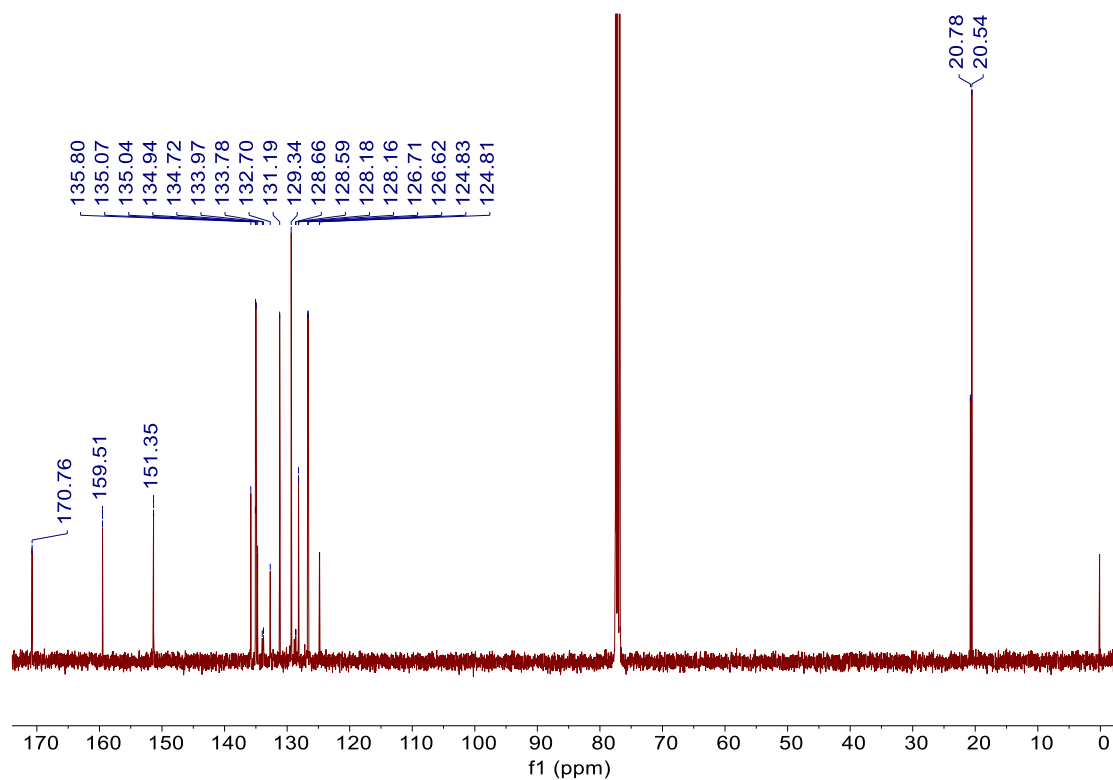

**Figure S21.** <sup>13</sup>C NMR spectrum [Ru(L3)Cl<sub>2</sub>(PPh<sub>3</sub>)] (C3).

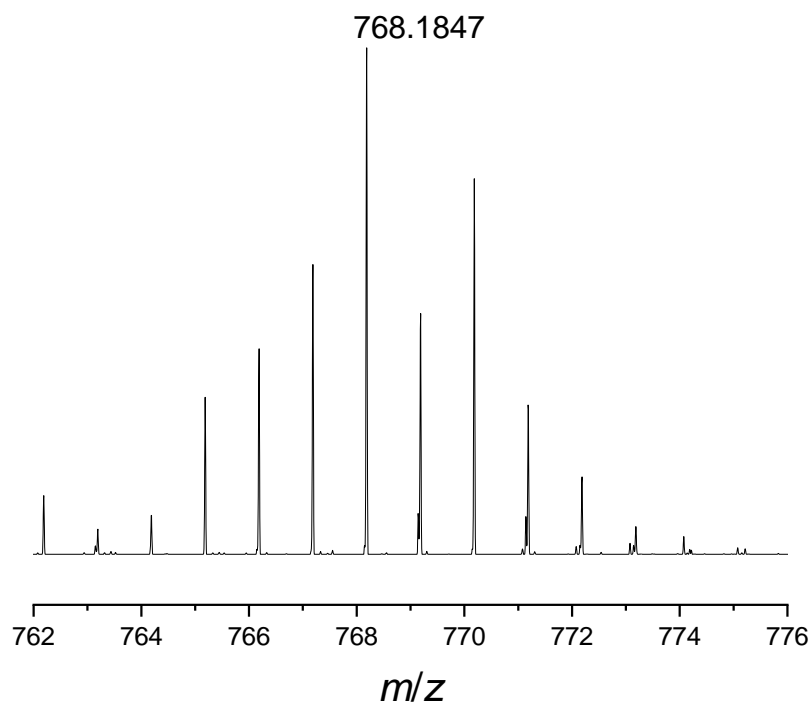

**Figure S22.** HRESI-MS data of **C3**.

## 2.9 Synthesis of $[\text{Ru}(\text{L4})\text{Cl}_2(\text{PPh}_3)]$ (**C4**).

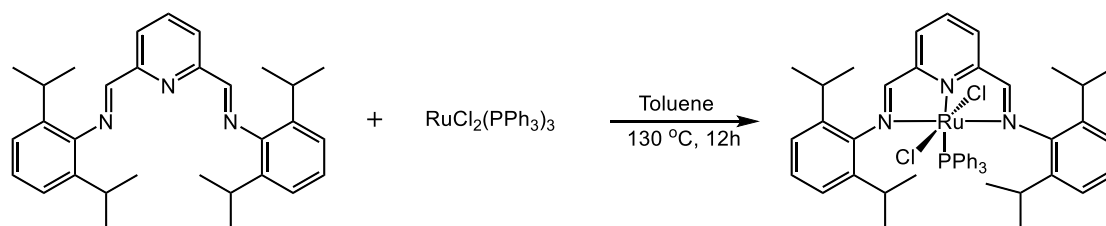

2,6-bis(2,6-diisopropylphenyliminomethyl)pyridine (**L4**) (0.1361 g, 0.3 mmol) and  $\text{RuCl}_2(\text{PPh}_3)_3$  (0.2874 g, 0.3 mmol) were dissolved in anhydrous toluene (20 mL) under an argon atmosphere. The mixture was refluxed for 12 hours, during which the color remained dark violet. After this period, the solvent was evacuated, and the residue was washed with diethyl ether ( $3 \times 10$  mL) followed by pentane ( $3 \times 10$  mL). A small amount of dichloromethane (5 mL) was then added to completely dissolve the residue, after which pentane (30 mL) was added dropwise with stirring. The solution was filtered,

and the dark-violet solid of  $[\text{Ru}(\text{L4})\text{Cl}_2(\text{PPh}_3)]$  (**C4**) (0.161 g, 60% yield) was obtained after vacuum drying. Crystals suitable for X-ray analysis were produced by slowly diffusing pentane (4 mL) into a dichloromethane solution (2 mL) of **C4** (20 mg). Anal. Calc. for  $\text{C}_{49}\text{H}_{54}\text{Cl}_2\text{N}_3\text{PRu}\cdot\text{CH}_2\text{Cl}_2$ : C, 61.73; H, 5.80; N, 4.32. Found: C, 61.59; H, 5.63; N, 4.42.  $^1\text{H}$  NMR (400 MHz, Acetone- $d_6$ )  $\delta$  8.66 (s, 1H), 8.26 (dd,  $J = 7.8, 1.2$  Hz, 1H), 8.23 (s, 1H), 8.15 (d,  $J = 7.9$  Hz, 1H), 8.02 (t,  $J = 7.8$  Hz, 1H), 7.45 – 7.36 (m, 4H), 7.35 – 7.23 (m, 7H), 7.22 – 7.17 (m, 2H), 7.11 (t,  $J = 7.7$  Hz, 3H), 6.95 – 6.82 (m, 6H), 3.76 (hept,  $J = 6.7$  Hz, 2H), 3.51 (hept,  $J = 6.7$  Hz, 2H), 1.11 (d,  $J = 6.6$  Hz, 7H), 1.01 (d,  $J = 6.8$  Hz, 6H), 0.86 (d,  $J = 6.7$  Hz, 7H), 0.61 (d,  $J = 6.7$  Hz, 6H).  $^{31}\text{P}$  NMR (162 MHz,  $\text{CDCl}_3$ )  $\delta$  16.69.  $^{13}\text{C}$  NMR (101 MHz,  $\text{CDCl}_3$ )  $\delta$  171.27, 159.51, 151.67, 142.14, 134.95, 134.86, 134.15, 133.82, 132.68, 128.47, 128.27, 127.41, 127.04, 126.95, 125.03, 125.00, 123.87, 70.64, 27.59, 26.53, 25.97, 22.12. HRMS (ESI):  $m/z$  calculated for  $[\text{C}_{49}\text{H}_{54}\text{Cl}_2\text{N}_3\text{PRu}]^+$ : 887.2478; Found: 887.2466.

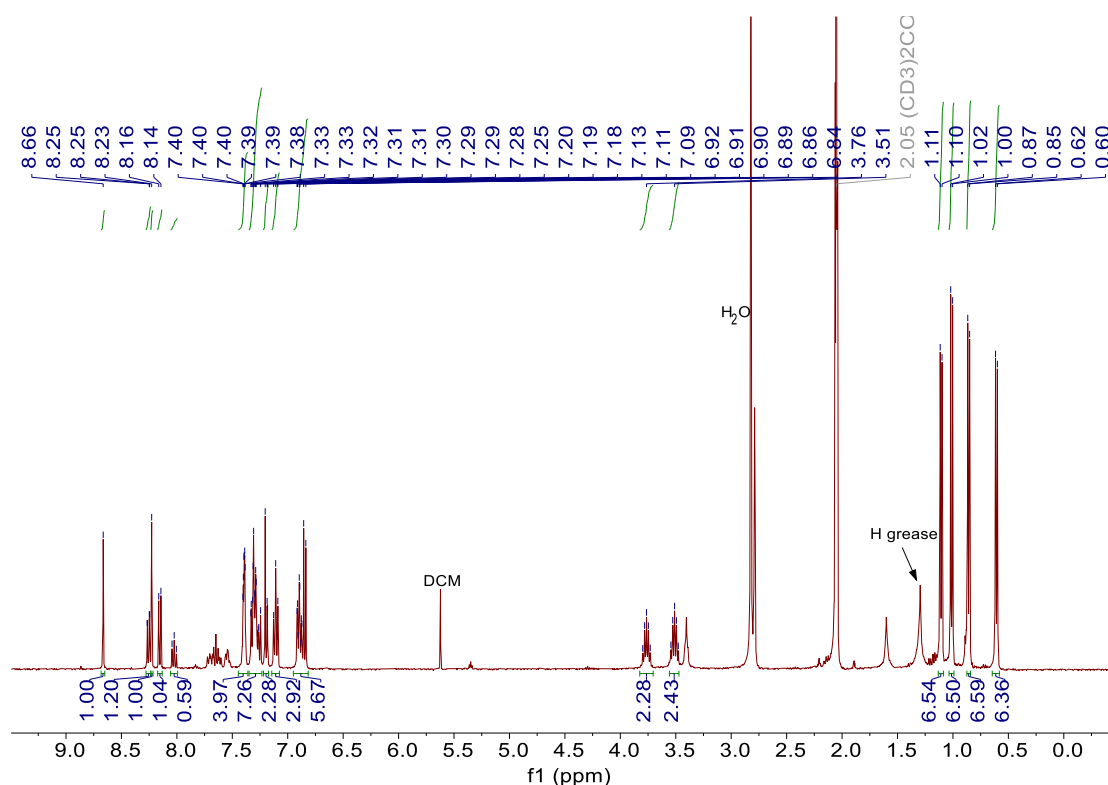

**Figure S23.**  $^1\text{H}$  NMR spectrum  $[\text{Ru}(\text{L4})\text{Cl}_2(\text{PPh}_3)]$  (**C4**) in acetone- $d_6$ .

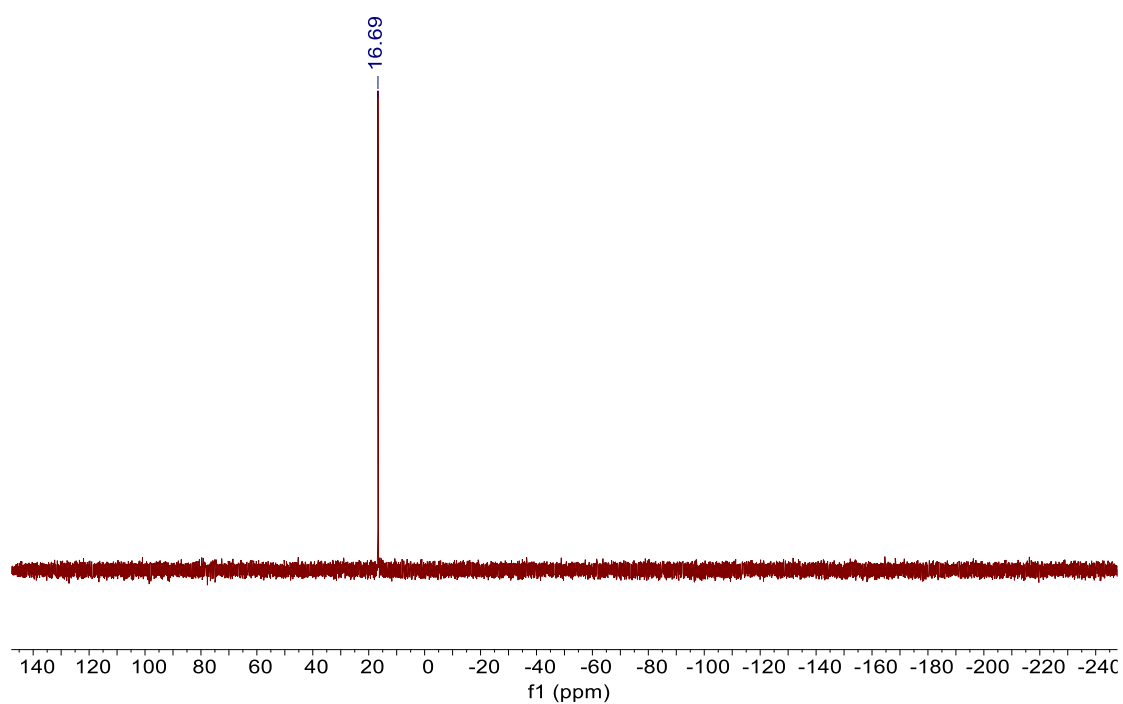

**Figure S24.** <sup>31</sup>P NMR spectrum [Ru(L4)Cl<sub>2</sub>(PPh<sub>3</sub>)] (C4) in CDCl<sub>3</sub>.

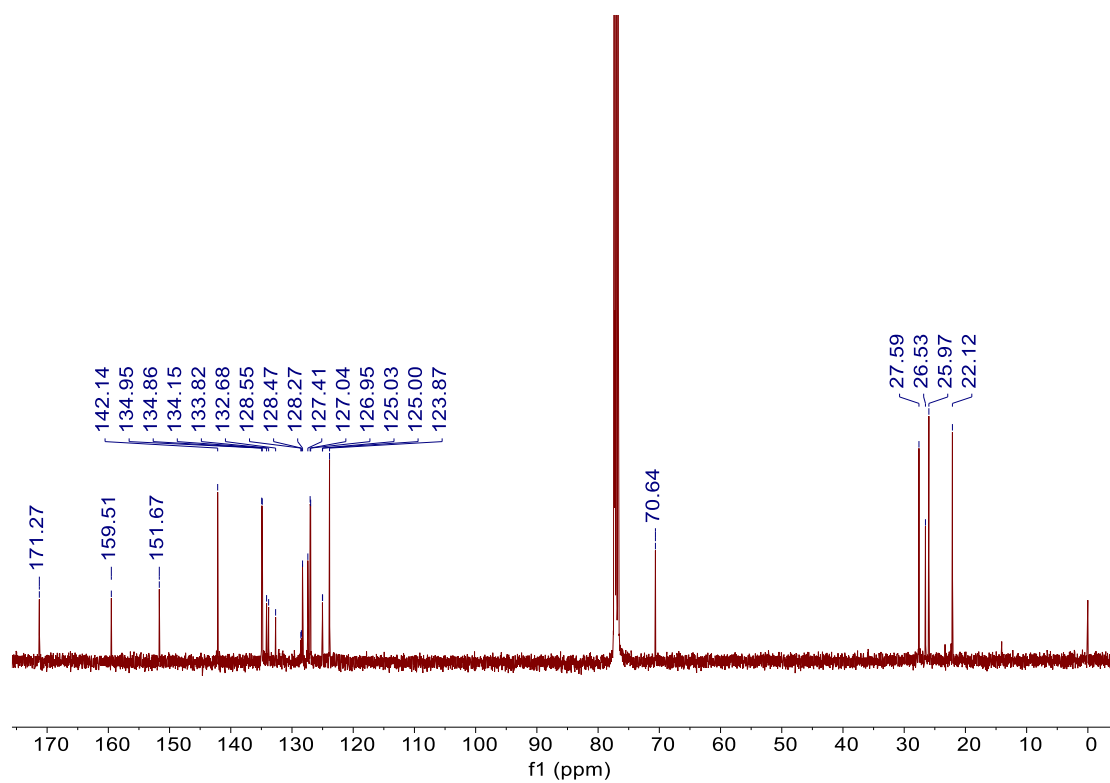

**Figure S25.** <sup>13</sup>C NMR spectrum [Ru(L4)Cl<sub>2</sub>(PPh<sub>3</sub>)] (C4) in CDCl<sub>3</sub>.

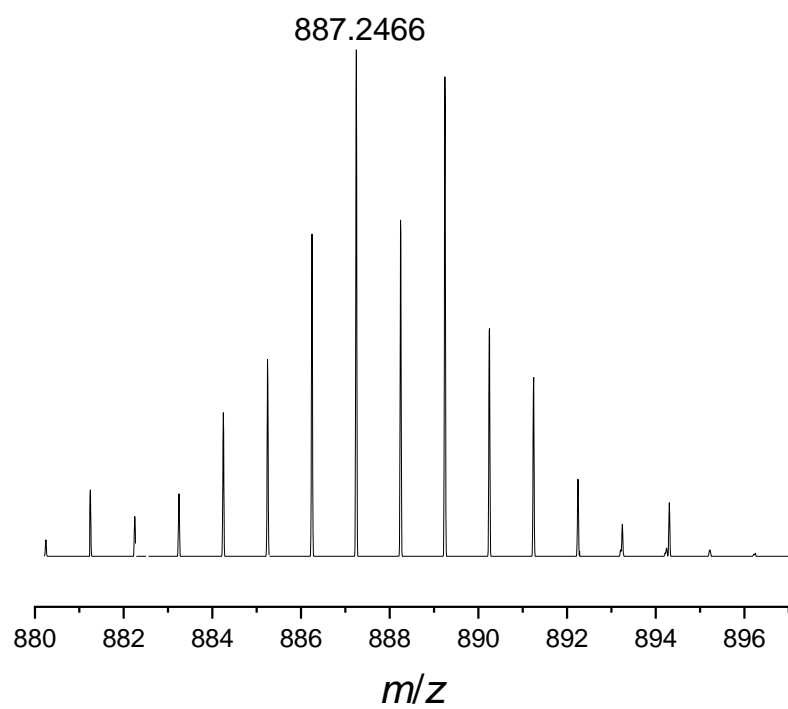

**Figure S26.** HRESI-MS data of **C4**.



### 3. Catalytic experimental data

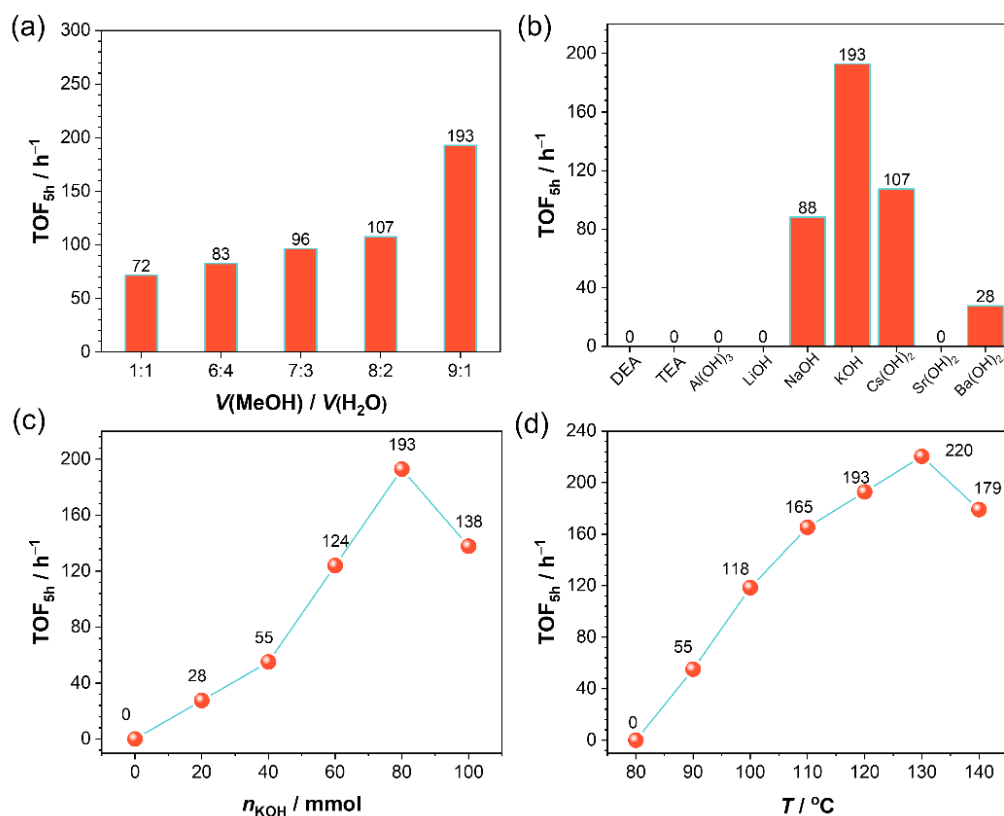

**Figure S27.** Optimization of reaction conditions for APRM using **C4**. a) Screening of MeOH/H<sub>2</sub>O volumetric ratio for APRM using **C4**. Reaction conditions: MeOH/H<sub>2</sub>O (10 mL),  $n_{\text{KOH}} = 80 \text{ mmol}$ ,  $T_{\text{set}} = 120 \text{ }^{\circ}\text{C}$ ,  $n_{\text{cat}} = 3 \text{ } \mu\text{mol}$ ; b) Screening of base type on the catalytic performance using **C4**. Reaction conditions: MeOH/H<sub>2</sub>O ( $v/v = 9:1$ , 10 mL),  $n_{\text{base}} = 80 \text{ mmol}$ ,  $T_{\text{set}} = 120 \text{ }^{\circ}\text{C}$ ,  $n_{\text{cat}} = 3 \text{ } \mu\text{mol}$ . c) Screening of KOH amount on APRM using **C4**. Reaction conditions: MeOH/H<sub>2</sub>O ( $v/v = 9:1$ , 10 mL),  $T_{\text{set}} = 120 \text{ }^{\circ}\text{C}$ ,  $n_{\text{cat}} = 3 \text{ } \mu\text{mol}$ . d) Screening of reaction temperature for APRM using **C4**. Reaction conditions: MeOH/H<sub>2</sub>O ( $v/v = 9:1$ , 10 mL),  $n_{\text{KOH}} = 80 \text{ mmol}$ ,  $n_{\text{cat}} = 3 \text{ } \mu\text{mol}$ .

#### 4. Catalytic mechanism analysis.

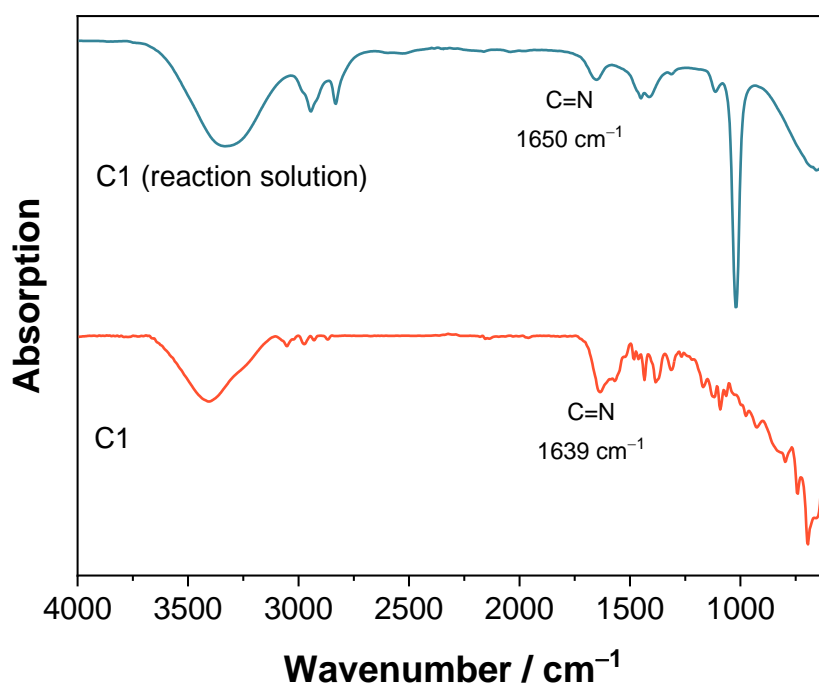

Figure S28. IR spectrum of reaction solution using C1.

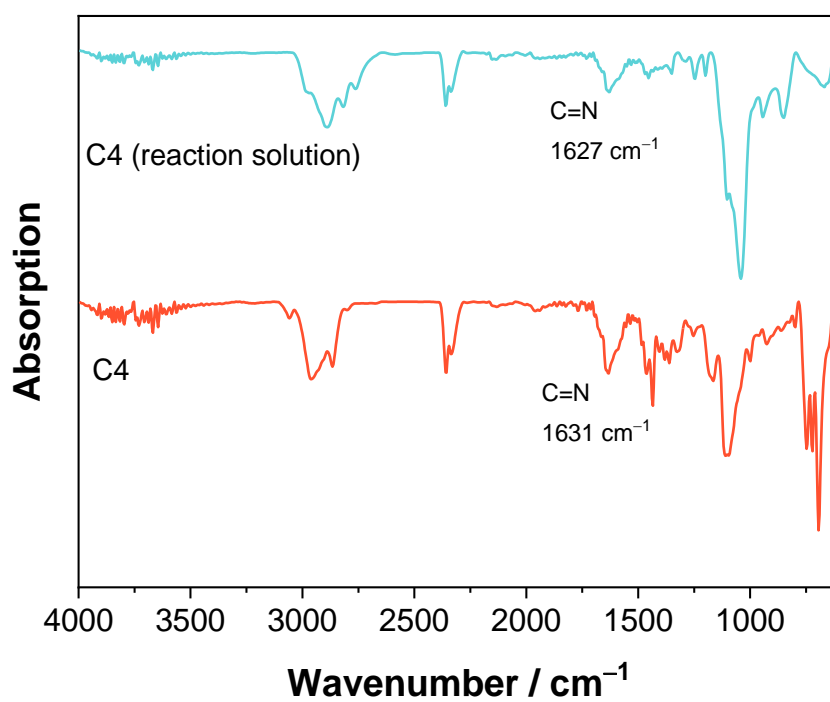

Figure S29. IR spectrum of reaction solution using C4.

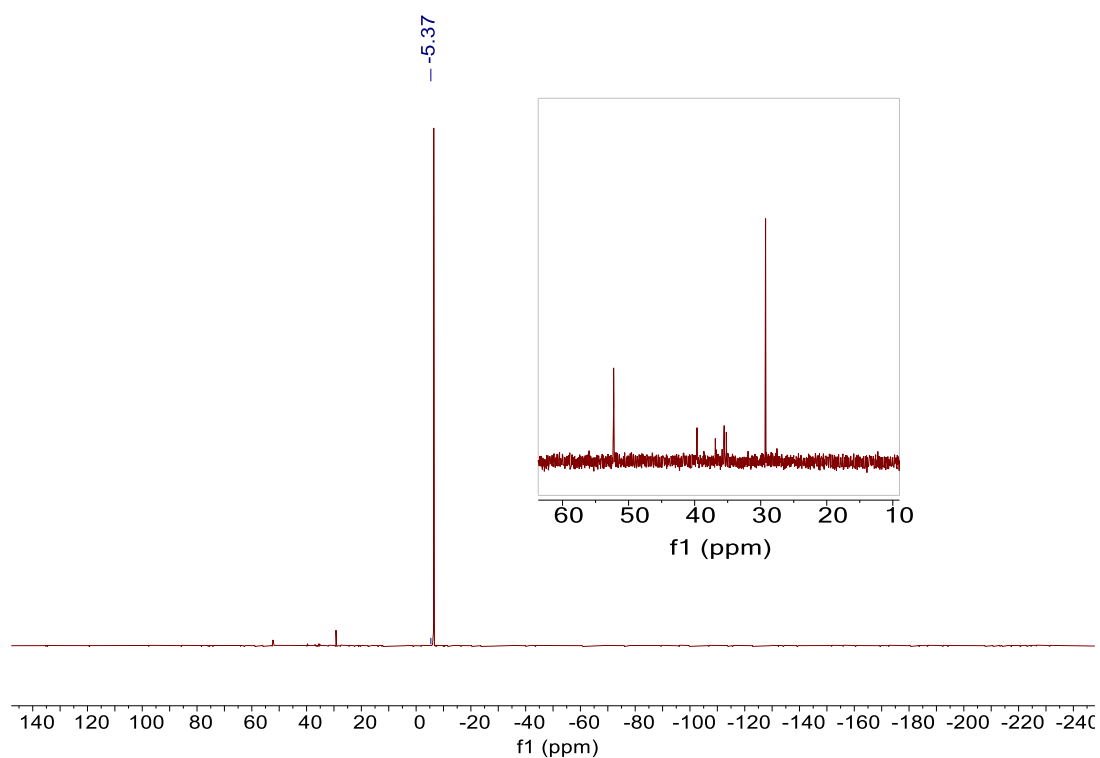

**Figure S30.**  $^{31}\text{P}$  NMR spectrum of reaction solution using **C4** as catalyst.

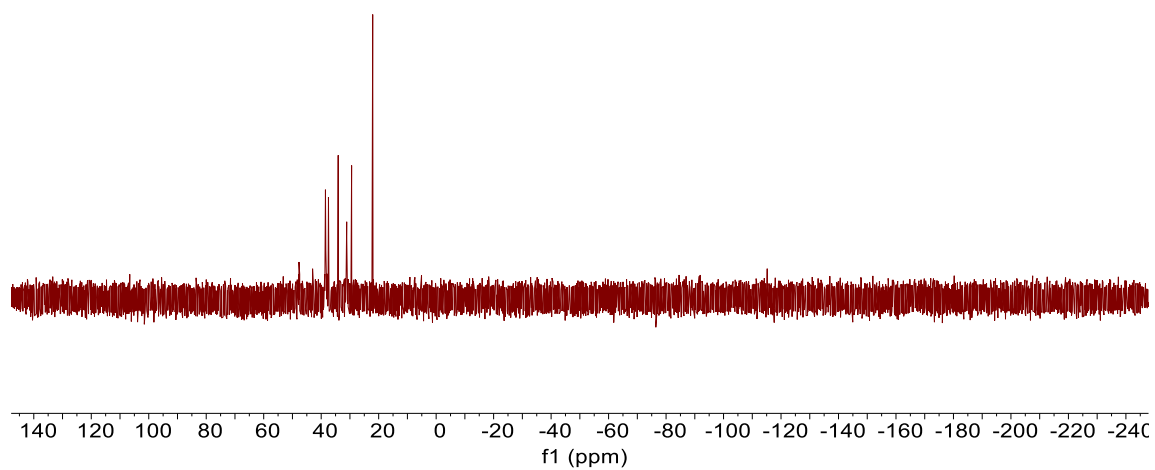

**Figure S31.**  $^{31}\text{P}$  NMR spectrum of reaction solution using **C1** as catalyst.

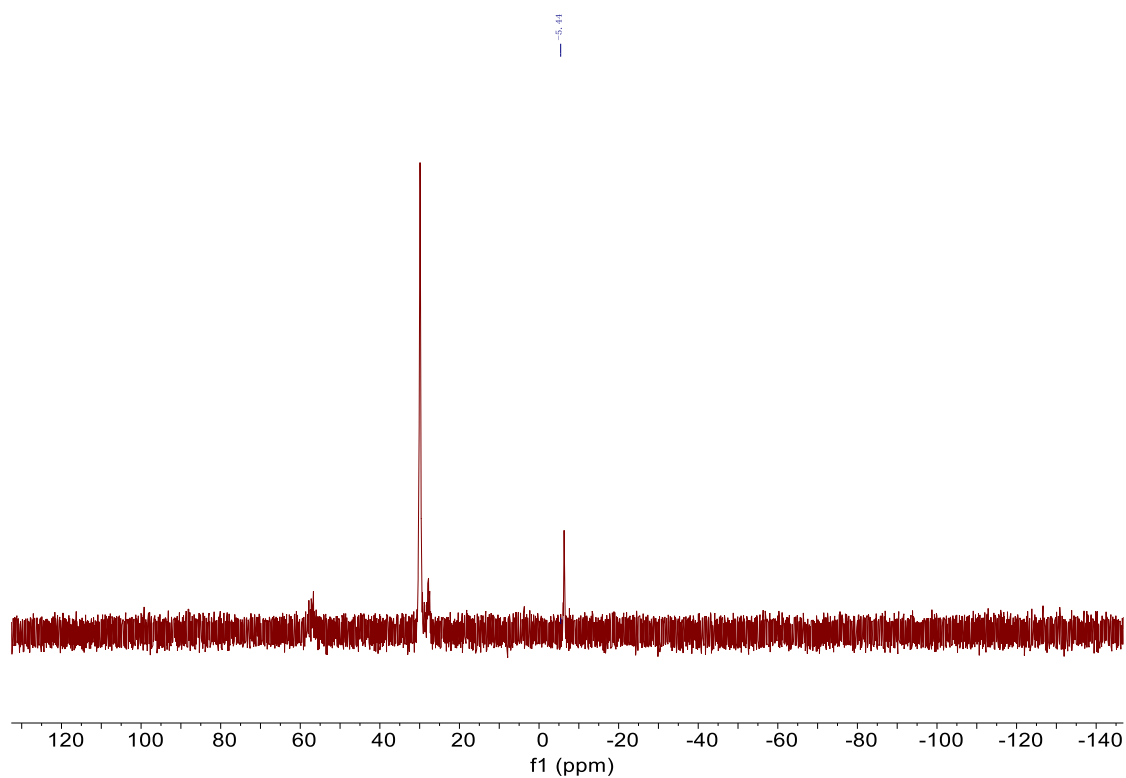

**Figure S32.**  $^{31}\text{P}$  NMR spectrum of reaction solution using **C2** as catalyst.

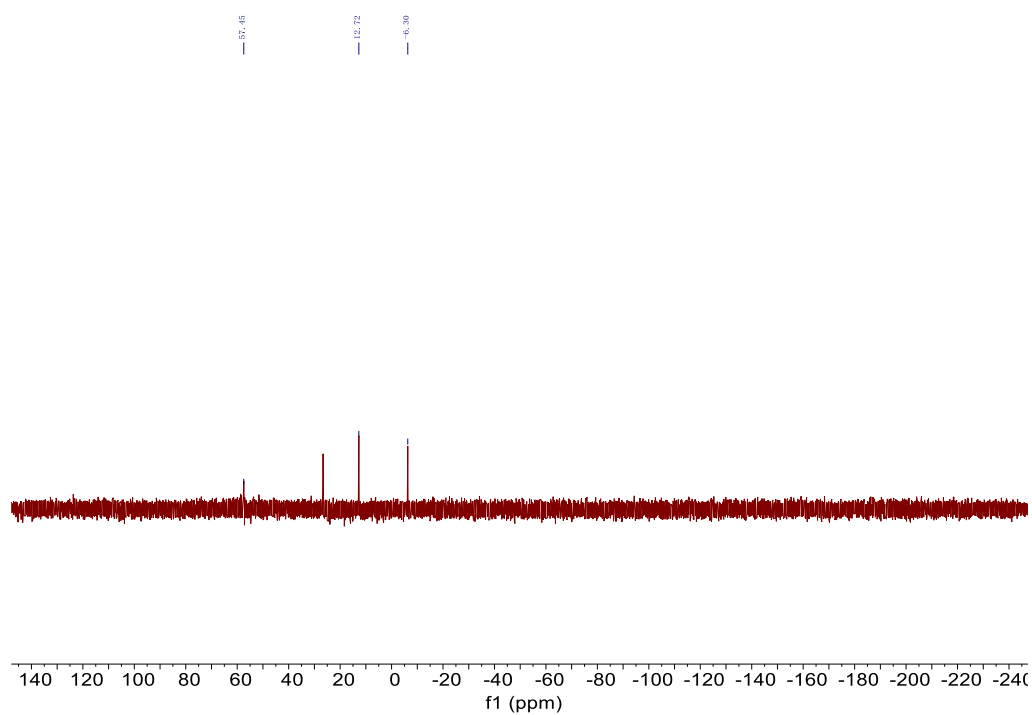

**Figure S33.**  $^{31}\text{P}$  NMR spectrum of reaction solution using **C3** as catalyst.

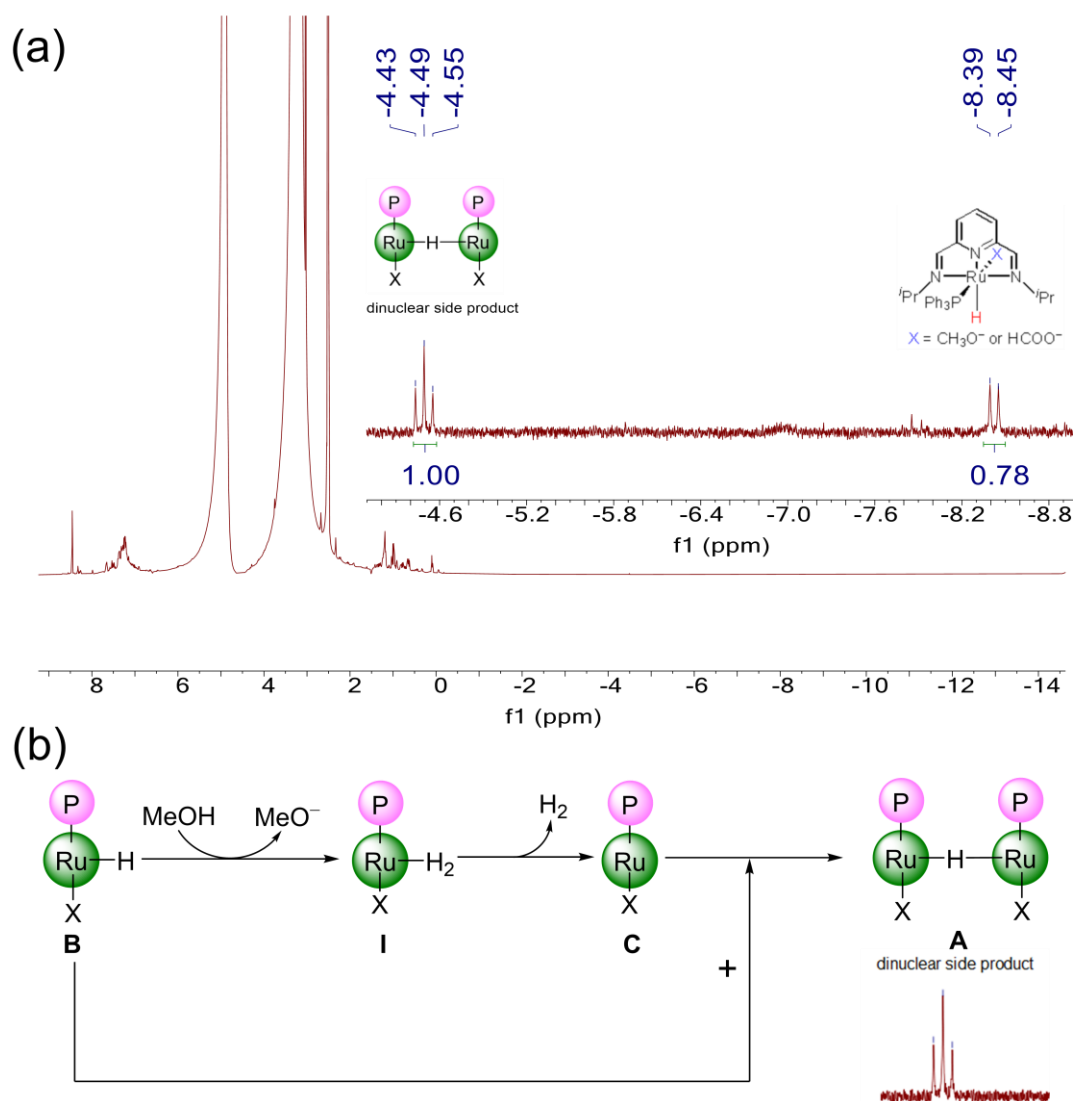

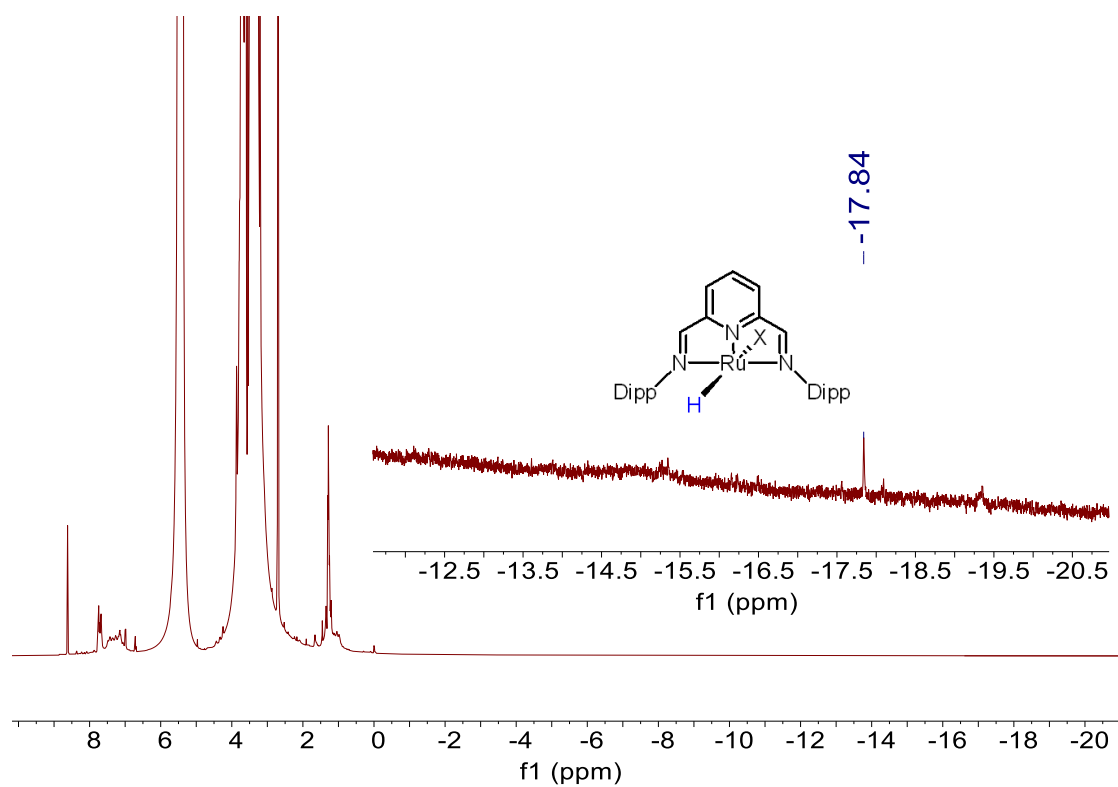

**Figure S35.**  $^1\text{H}$  NMR spectrum of reaction solution using **C4** as catalyst.

## 5. Crystallography Information.

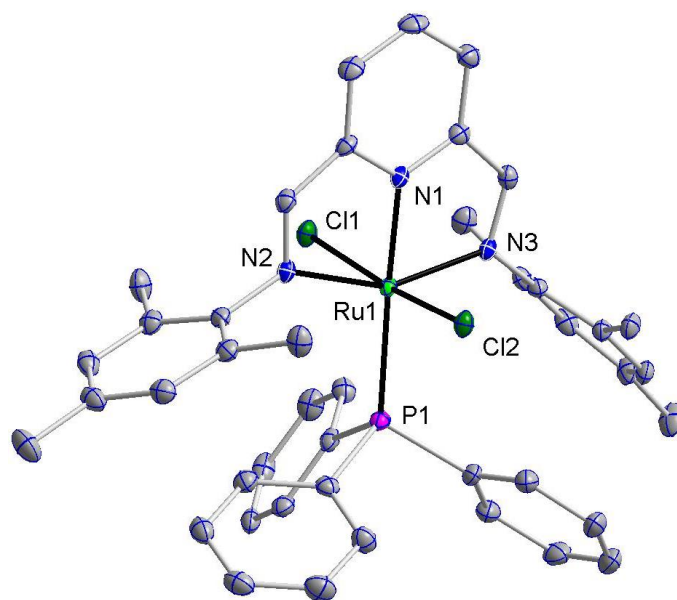

**Figure S36.** ORTEP diagrams of the molecular structures of **C3**.

**Table S1.** Crystal data and structure refinement for **C3**.

| Identification code                                          | <b>C3</b>                                                                         |
|--------------------------------------------------------------|-----------------------------------------------------------------------------------|
| Empirical formula                                            | C <sub>45</sub> H <sub>50</sub> Cl <sub>2</sub> N <sub>3</sub> O <sub>2</sub> PRu |
| Formula weight                                               | 867.82                                                                            |
| Temperature/K                                                | 100.01                                                                            |
| Crystal system                                               | monoclinic                                                                        |
| Space group                                                  | <i>P</i> 2 <sub>1</sub> / <i>c</i>                                                |
| <i>a</i> /Å                                                  | 20.9459(13)                                                                       |
| <i>b</i> /Å                                                  | 14.1401(9)                                                                        |
| <i>c</i> /Å                                                  | 14.5156(9)                                                                        |
| $\alpha$ /°                                                  | 90                                                                                |
| $\beta$ /°                                                   | 109.756(2)                                                                        |
| $\gamma$ /°                                                  | 90                                                                                |
| Volume/Å <sup>3</sup>                                        | 4046.1(4)                                                                         |
| <i>Z</i>                                                     | 4                                                                                 |
| $\rho_{\text{calc}}$ /cm <sup>3</sup>                        | 1.425                                                                             |
| $\mu$ /mm <sup>-1</sup>                                      | 0.601                                                                             |
| <i>F</i> (000)                                               | 1800.0                                                                            |
| Crystal size/mm <sup>3</sup>                                 | 0.217 × 0.191 × 0.065                                                             |
| Radiation                                                    | MoK $\alpha$ ( $\lambda$ = 0.71073)                                               |
| 2 $\theta$ range for data collection/°                       | 5.038 to 55.32                                                                    |
| Index ranges                                                 | -27 ≤ <i>h</i> ≤ 27, -18 ≤ <i>k</i> ≤ 18, -18 ≤ <i>l</i> ≤ 18                     |
| Reflections collected                                        | 127394                                                                            |
| Independent reflections                                      | 9390 [ <i>R</i> <sub>int</sub> = 0.0757, <i>R</i> <sub>sigma</sub> = 0.0304]      |
| Data/restraints/parameters                                   | 9390/0/496                                                                        |
| Goodness-of-fit on <i>F</i> <sup>2</sup>                     | 1.127                                                                             |
| Final <i>R</i> indexes [ <i>I</i> ≥ 2 $\sigma$ ( <i>I</i> )] | <i>R</i> <sub>1</sub> = 0.0491, <i>wR</i> <sub>2</sub> = 0.1108                   |
| Final <i>R</i> indexes [all data]                            | <i>R</i> <sub>1</sub> = 0.0571, <i>wR</i> <sub>2</sub> = 0.1156                   |
| Largest diff. peak/hole / e Å <sup>-3</sup>                  | 3.38/-1.25                                                                        |

**Table S2.** Bond Lengths for **C3**.

| Atom | Atom | Length/Å  | Atom | Atom | Length/Å |
|------|------|-----------|------|------|----------|
| Ru1  | Cl1  | 2.3995(8) | C2   | C3   | 1.400(5) |
| Ru1  | Cl2  | 2.3987(8) | C3   | C6   | 1.451(5) |
| Ru1  | P1   | 2.4007(8) | C7   | C14  | 1.402(4) |
| Ru1  | N1   | 1.993(3)  | C7   | C8   | 1.402(4) |
| Ru1  | N2   | 2.223(3)  | C14  | C15  | 1.513(4) |
| Ru1  | N3   | 2.102(3)  | C14  | C13  | 1.397(5) |
| P1   | C38  | 1.851(3)  | C13  | C11  | 1.392(5) |
| P1   | C26  | 1.847(4)  | C11  | C12  | 1.509(5) |
| P1   | C32  | 1.847(3)  | C11  | C10  | 1.388(5) |
| O1   | C2S  | 1.402(6)  | C10  | C8   | 1.400(5) |
| O2   | C1S  | 1.399(5)  | C8   | C9   | 1.513(5) |
| N1   | C4   | 1.346(4)  | C38  | C43  | 1.401(5) |
| N1   | C3   | 1.342(4)  | C38  | C39  | 1.403(5) |
| N2   | C16  | 1.297(4)  | C43  | C42  | 1.393(5) |
| N2   | C17  | 1.470(4)  | C42  | C41  | 1.387(6) |
| N3   | C6   | 1.305(4)  | C41  | C40  | 1.389(6) |
| N3   | C7   | 1.455(4)  | C40  | C39  | 1.397(5) |
| C4   | C16  | 1.457(5)  | C26  | C27  | 1.391(5) |
| C4   | C5   | 1.392(4)  | C26  | C31  | 1.403(5) |
| C17  | C18  | 1.404(5)  | C27  | C28  | 1.396(5) |
| C17  | C24  | 1.402(5)  | C28  | C29  | 1.386(6) |
| C18  | C20  | 1.400(5)  | C29  | C30  | 1.383(6) |
| C18  | C19  | 1.504(5)  | C30  | C31  | 1.392(5) |
| C20  | C21  | 1.391(5)  | C32  | C37  | 1.402(5) |
| C21  | C22  | 1.510(5)  | C32  | C33  | 1.393(5) |
| C21  | C23  | 1.393(5)  | C37  | C36  | 1.391(5) |
| C23  | C24  | 1.402(5)  | C36  | C35  | 1.383(5) |
| C24  | C25  | 1.503(5)  | C35  | C34  | 1.386(5) |
| C5   | C1   | 1.386(5)  | C34  | C33  | 1.390(5) |
| C1   | C2   | 1.388(5)  |      |      |          |



**Table S3.** Bond Angles for **C3**.

| Atom | Atom | Atom | Angle/°    | Atom | Atom | Atom | Angle/°  |
|------|------|------|------------|------|------|------|----------|
| Cl1  | Ru1  | P1   | 96.87(3)   | C23  | C24  | C25  | 119.6(3) |
| Cl2  | Ru1  | Cl1  | 171.62(3)  | C1   | C5   | C4   | 118.5(3) |
| Cl2  | Ru1  | P1   | 90.68(3)   | C5   | C1   | C2   | 120.3(3) |
| N1   | Ru1  | Cl1  | 85.08(8)   | C1   | C2   | C3   | 118.4(3) |
| N1   | Ru1  | Cl2  | 87.46(8)   | N1   | C3   | C2   | 120.9(3) |
| N1   | Ru1  | P1   | 177.64(8)  | N1   | C3   | C6   | 111.9(3) |
| N1   | Ru1  | N2   | 76.96(11)  | C2   | C3   | C6   | 127.1(3) |
| N1   | Ru1  | N3   | 77.32(11)  | N3   | C6   | C3   | 117.7(3) |
| N2   | Ru1  | Cl1  | 86.10(7)   | C14  | C7   | N3   | 119.2(3) |
| N2   | Ru1  | Cl2  | 88.50(7)   | C14  | C7   | C8   | 120.7(3) |
| N2   | Ru1  | P1   | 104.46(7)  | C8   | C7   | N3   | 120.1(3) |
| N3   | Ru1  | Cl1  | 89.87(7)   | C7   | C14  | C15  | 121.6(3) |
| N3   | Ru1  | Cl2  | 92.22(7)   | C13  | C14  | C7   | 118.1(3) |
| N3   | Ru1  | P1   | 101.30(8)  | C13  | C14  | C15  | 120.0(3) |
| N3   | Ru1  | N2   | 154.22(10) | C11  | C13  | C14  | 122.4(3) |
| C38  | P1   | Ru1  | 118.44(11) | C13  | C11  | C12  | 120.9(3) |
| C26  | P1   | Ru1  | 115.52(11) | C10  | C11  | C13  | 117.7(3) |
| C26  | P1   | C38  | 101.85(15) | C10  | C11  | C12  | 121.3(3) |
| C32  | P1   | Ru1  | 117.00(11) | C11  | C10  | C8   | 122.1(3) |
| C32  | P1   | C38  | 99.89(15)  | C7   | C8   | C9   | 123.2(3) |
| C32  | P1   | C26  | 101.32(15) | C10  | C8   | C7   | 118.4(3) |
| C4   | N1   | Ru1  | 120.0(2)   | C10  | C8   | C9   | 118.3(3) |
| C3   | N1   | Ru1  | 119.3(2)   | C43  | C38  | P1   | 122.0(3) |
| C3   | N1   | C4   | 120.7(3)   | C43  | C38  | C39  | 118.5(3) |
| C16  | N2   | Ru1  | 110.3(2)   | C39  | C38  | P1   | 119.6(3) |
| C16  | N2   | C17  | 111.5(3)   | C42  | C43  | C38  | 120.8(3) |
| C17  | N2   | Ru1  | 138.2(2)   | C41  | C42  | C43  | 120.4(4) |
| C6   | N3   | Ru1  | 113.7(2)   | C42  | C41  | C40  | 119.5(3) |
| C6   | N3   | C7   | 114.5(3)   | C41  | C40  | C39  | 120.5(4) |
| C7   | N3   | Ru1  | 131.8(2)   | C40  | C39  | C38  | 120.3(3) |
| N1   | C4   | C16  | 113.0(3)   | C27  | C26  | P1   | 124.0(3) |

| (to be continued) |     |     |          |     |     |     |          |
|-------------------|-----|-----|----------|-----|-----|-----|----------|
| N1                | C4  | C5  | 121.2(3) | C27 | C26 | C31 | 118.2(3) |
| C5                | C4  | C16 | 125.8(3) | C31 | C26 | P1  | 117.8(3) |
| N2                | C16 | C4  | 119.8(3) | C26 | C27 | C28 | 120.7(4) |
| C18               | C17 | N2  | 120.1(3) | C29 | C28 | C27 | 120.3(4) |
| C24               | C17 | N2  | 118.5(3) | C30 | C29 | C28 | 119.8(3) |
| C24               | C17 | C18 | 121.2(3) | C29 | C30 | C31 | 120.1(3) |
| C17               | C18 | C19 | 122.8(3) | C30 | C31 | C26 | 120.9(3) |
| C20               | C18 | C17 | 118.1(3) | C37 | C32 | P1  | 122.8(3) |
| C20               | C18 | C19 | 119.2(3) | C33 | C32 | P1  | 118.4(3) |
| C21               | C20 | C18 | 122.4(3) | C33 | C32 | C37 | 118.6(3) |
| C20               | C21 | C22 | 121.4(3) | C36 | C37 | C32 | 120.5(3) |
| C20               | C21 | C23 | 118.0(3) | C35 | C36 | C37 | 120.0(3) |
| C23               | C21 | C22 | 120.6(3) | C36 | C35 | C34 | 120.3(3) |
| C21               | C23 | C24 | 122.0(3) | C35 | C34 | C33 | 119.7(3) |
| C17               | C24 | C23 | 118.3(3) | C34 | C33 | C32 | 120.9(3) |
| C17               | C24 | C25 | 122.0(3) |     |     |     |          |

---

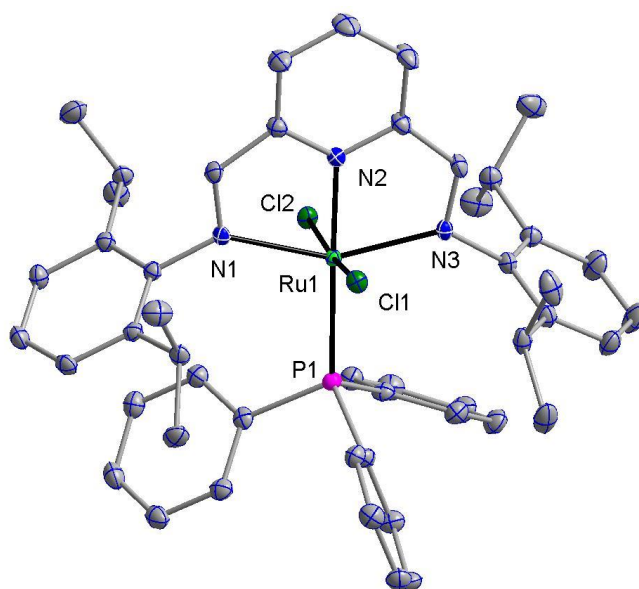

**Figure S37.** ORTEP diagrams of the molecular structures of **C4**.

**Table S4.** Crystal data and structure refinement for **C4**.

| Identification code                                          | <b>C4</b>                                                                     |
|--------------------------------------------------------------|-------------------------------------------------------------------------------|
| Empirical formula                                            | C <sub>50</sub> H <sub>56</sub> Cl <sub>4</sub> N <sub>3</sub> PRu            |
| Formula weight                                               | 972.81                                                                        |
| Temperature/K                                                | 100.0                                                                         |
| Crystal system                                               | triclinic                                                                     |
| Space group                                                  | <i>P</i> -1                                                                   |
| <i>a</i> /Å                                                  | 10.8192(6)                                                                    |
| <i>b</i> /Å                                                  | 12.7886(7)                                                                    |
| <i>c</i> /Å                                                  | 17.5557(8)                                                                    |
| $\alpha$ /°                                                  | 98.8008(17)                                                                   |
| $\beta$ /°                                                   | 100.834(3)                                                                    |
| $\gamma$ /°                                                  | 92.670(2)                                                                     |
| Volume/Å <sup>3</sup>                                        | 2350.6(2)                                                                     |
| <i>Z</i>                                                     | 2                                                                             |
| $\rho_{\text{calc}}$ /cm <sup>3</sup>                        | 1.374                                                                         |
| $\mu$ /mm <sup>-1</sup>                                      | 0.632                                                                         |
| <i>F</i> (000)                                               | 1008.0                                                                        |
| Crystal size/mm <sup>3</sup>                                 | 0.202 × 0.127 × 0.068                                                         |
| Radiation                                                    | MoK $\alpha$ ( $\lambda$ = 0.71073)                                           |
| 2 $\Theta$ range for data collection/°                       | 4.79 to 55.016                                                                |
| Index ranges                                                 | -14 ≤ <i>h</i> ≤ 14, -16 ≤ <i>k</i> ≤ 16, -22 ≤ <i>l</i> ≤ 22                 |
| Reflections collected                                        | 78585                                                                         |
| Independent reflections                                      | 10777 [ <i>R</i> <sub>int</sub> = 0.0509, <i>R</i> <sub>sigma</sub> = 0.0285] |
| Data/restraints/parameters                                   | 10777/0/540                                                                   |
| Goodness-of-fit on <i>F</i> <sup>2</sup>                     | 1.041                                                                         |
| Final <i>R</i> indexes [ <i>I</i> ≥ 2 $\sigma$ ( <i>I</i> )] | <i>R</i> <sub>1</sub> = 0.0303, <i>wR</i> <sub>2</sub> = 0.0736               |
| Final <i>R</i> indexes [all data]                            | <i>R</i> <sub>1</sub> = 0.0356, <i>wR</i> <sub>2</sub> = 0.0767               |
| Largest diff. peak/hole / e Å <sup>-3</sup>                  | 1.24/-0.97                                                                    |

**Table S5.** Bond Lengths for **C4**.

| Atom | Atom | Length/Å   | Atom | Atom | Length/Å |
|------|------|------------|------|------|----------|
| Ru1  | Cl1  | 2.4241(5)  | C20  | C21  | 1.408(3) |
| Ru1  | Cl2  | 2.3993(5)  | C20  | C28  | 1.411(3) |
| Ru1  | P1   | 2.4300(5)  | C21  | C22  | 1.527(3) |
| Ru1  | N1   | 2.1624(15) | C21  | C25  | 1.398(3) |
| Ru1  | N2   | 1.9891(15) | C22  | C23  | 1.532(3) |
| Ru1  | N3   | 2.1415(15) | C22  | C24  | 1.535(3) |
| P1   | C32  | 1.8528(19) | C25  | C26  | 1.387(3) |
| P1   | C38  | 1.8465(19) | C26  | C27  | 1.386(3) |
| P1   | C44  | 1.8565(19) | C27  | C28  | 1.392(3) |
| N1   | C9   | 1.458(2)   | C28  | C29  | 1.517(3) |
| N1   | C13  | 1.299(2)   | C29  | C30  | 1.541(3) |
| N2   | C14  | 1.345(2)   | C29  | C31  | 1.529(3) |
| N2   | C18  | 1.347(2)   | C32  | C33  | 1.406(3) |
| N3   | C19  | 1.301(2)   | C32  | C37  | 1.398(3) |
| N3   | C20  | 1.458(2)   | C33  | C34  | 1.394(3) |
| C1   | C2   | 1.526(3)   | C34  | C35  | 1.385(3) |
| C2   | C3   | 1.541(3)   | C35  | C36  | 1.390(3) |
| C2   | C4   | 1.514(3)   | C36  | C37  | 1.390(3) |
| C4   | C5   | 1.396(3)   | C38  | C39  | 1.403(3) |
| C4   | C9   | 1.407(3)   | C38  | C43  | 1.394(3) |
| C5   | C6   | 1.386(3)   | C39  | C40  | 1.395(3) |
| C6   | C7   | 1.384(3)   | C40  | C41  | 1.392(3) |
| C7   | C8   | 1.400(3)   | C41  | C42  | 1.388(3) |
| C8   | C9   | 1.407(3)   | C42  | C43  | 1.394(3) |
| C8   | C10  | 1.528(3)   | C44  | C45  | 1.402(3) |
| C10  | C11  | 1.537(3)   | C44  | C49  | 1.396(3) |
| C10  | C12  | 1.536(3)   | C45  | C46  | 1.390(3) |
| C13  | C14  | 1.449(3)   | C46  | C47  | 1.390(3) |
| C14  | C15  | 1.393(3)   | C47  | C48  | 1.389(3) |
| C15  | C16  | 1.394(3)   | C48  | C49  | 1.401(3) |
| C16  | C17  | 1.388(3)   | Cl1S | C1S  | 1.747(3) |
| C17  | C18  | 1.393(3)   | Cl2S | C1S  | 1.768(3) |
| C18  | C19  | 1.449(3)   |      |      |          |

**Table S6.** Bond Angles for **C4**.

| Atom | Atom | Atom | Angle/°     | Atom | Atom | Atom | Angle/°    |
|------|------|------|-------------|------|------|------|------------|
| Cl1  | Ru1  | P1   | 99.644(16)  | C15  | C14  | C13  | 126.74(18) |
| Cl2  | Ru1  | Cl1  | 172.345(16) | C14  | C15  | C16  | 118.55(19) |
| Cl2  | Ru1  | P1   | 87.958(16)  | C17  | C16  | C15  | 119.54(18) |
| N1   | Ru1  | Cl1  | 89.23(4)    | C16  | C17  | C18  | 119.07(19) |
| N1   | Ru1  | Cl2  | 87.98(4)    | N2   | C18  | C17  | 121.04(18) |
| N1   | Ru1  | P1   | 104.40(4)   | N2   | C18  | C19  | 112.02(16) |
| N2   | Ru1  | Cl1  | 80.22(5)    | C17  | C18  | C19  | 126.93(18) |
| N2   | Ru1  | Cl2  | 92.20(5)    | N3   | C19  | C18  | 119.06(17) |
| N2   | Ru1  | P1   | 178.66(5)   | C21  | C20  | N3   | 118.93(16) |
| N2   | Ru1  | N1   | 76.93(6)    | C21  | C20  | C28  | 122.10(17) |
| N2   | Ru1  | N3   | 77.56(6)    | C28  | C20  | N3   | 118.73(17) |
| N3   | Ru1  | Cl1  | 89.20(4)    | C20  | C21  | C22  | 123.51(18) |
| N3   | Ru1  | Cl2  | 90.22(4)    | C25  | C21  | C20  | 117.37(18) |
| N3   | Ru1  | P1   | 101.11(4)   | C25  | C21  | C22  | 119.12(18) |
| N3   | Ru1  | N1   | 154.34(6)   | C21  | C22  | C23  | 111.64(17) |
| C32  | P1   | Ru1  | 116.86(6)   | C21  | C22  | C24  | 111.14(17) |
| C32  | P1   | C44  | 100.17(8)   | C23  | C22  | C24  | 110.72(18) |
| C38  | P1   | Ru1  | 121.57(6)   | C26  | C25  | C21  | 121.5(2)   |
| C38  | P1   | C32  | 99.56(9)    | C27  | C26  | C25  | 119.9(2)   |
| C38  | P1   | C44  | 102.49(9)   | C26  | C27  | C28  | 121.34(19) |
| C44  | P1   | Ru1  | 113.05(6)   | C20  | C28  | C29  | 120.96(17) |
| C9   | N1   | Ru1  | 135.03(12)  | C27  | C28  | C20  | 117.77(18) |
| C13  | N1   | Ru1  | 111.69(12)  | C27  | C28  | C29  | 121.20(18) |
| C13  | N1   | C9   | 112.93(15)  | C28  | C29  | C30  | 110.11(17) |
| C14  | N2   | Ru1  | 119.77(12)  | C28  | C29  | C31  | 113.55(18) |
| C14  | N2   | C18  | 120.28(16)  | C31  | C29  | C30  | 110.10(18) |
| C18  | N2   | Ru1  | 119.03(13)  | C33  | C32  | P1   | 122.48(15) |
| C19  | N3   | Ru1  | 111.86(12)  | C37  | C32  | P1   | 119.17(14) |
| C19  | N3   | C20  | 112.05(15)  | C37  | C32  | C33  | 118.23(18) |
| C20  | N3   | Ru1  | 136.00(12)  | C34  | C33  | C32  | 120.16(19) |
| C1   | C2   | C3   | 109.31(17)  | C35  | C34  | C33  | 120.94(19) |

(to be continued)

|     |     |     |            |      |     |      |            |
|-----|-----|-----|------------|------|-----|------|------------|
| C4  | C2  | C1  | 113.70(17) | C34  | C35 | C36  | 119.22(19) |
| C4  | C2  | C3  | 109.36(16) | C37  | C36 | C35  | 120.34(19) |
| C5  | C4  | C2  | 121.01(17) | C36  | C37 | C32  | 121.03(18) |
| C5  | C4  | C9  | 117.97(17) | C39  | C38 | P1   | 122.13(15) |
| C9  | C4  | C2  | 120.70(16) | C43  | C38 | P1   | 119.12(14) |
| C6  | C5  | C4  | 121.28(18) | C43  | C38 | C39  | 118.21(17) |
| C7  | C6  | C5  | 119.73(18) | C40  | C39 | C38  | 120.72(19) |
| C6  | C7  | C8  | 121.57(18) | C41  | C40 | C39  | 120.31(18) |
| C7  | C8  | C9  | 117.55(17) | C42  | C41 | C40  | 119.37(18) |
| C7  | C8  | C10 | 118.21(17) | C41  | C42 | C43  | 120.32(19) |
| C9  | C8  | C10 | 124.23(17) | C38  | C43 | C42  | 121.05(18) |
| C4  | C9  | N1  | 118.68(16) | C45  | C44 | P1   | 120.21(15) |
| C8  | C9  | N1  | 119.38(16) | C49  | C44 | P1   | 121.62(15) |
| C8  | C9  | C4  | 121.86(17) | C49  | C44 | C45  | 118.15(18) |
| C8  | C10 | C11 | 110.56(17) | C46  | C45 | C44  | 120.71(19) |
| C8  | C10 | C12 | 111.13(16) | C47  | C46 | C45  | 120.33(19) |
| C12 | C10 | C11 | 110.28(17) | C48  | C47 | C46  | 120.0(2)   |
| N1  | C13 | C14 | 119.19(17) | C47  | C48 | C49  | 119.3(2)   |
| N2  | C14 | C13 | 111.79(16) | C44  | C49 | C48  | 121.40(19) |
| N2  | C14 | C15 | 121.47(17) | Cl1S | C1S | Cl2S | 112.01(16) |

---

## 6. Supporting references.

- S1. Dolomanov, O. V.; Bourhis, L. J.; Gildea, R. J.; Howard, J. A. K.; Puschmann, H. OLEX2: A complete structure solution, refinement and analysis program. *J. Appl. Crystallogr.* **2009**, *42*, 339–341.
- S2. Sheldrick, G. M. SHELXT–Integrated space-group and crystal-structure determination. *Acta Crystallogr., Sect. A: Found. Adv.* **2015**, *71*, 3–8.
- S3. Sheldrick, G. M. Crystal structure refinement with SHELXL. *Acta Crystallogr., Sect. C: Struct. Chem.* **2015**, *71*, 3–8.
- S4. Das, K., Dutta, M., Das, B., Srivastava, H. K., Kumara, A., Efficient Pincer-Ruthenium Catalysts for Kharasch Addition of Carbon Tetrachloride to Styrene. *Adv. Synth. Catal.* **2019**, *361*, 2965–2980.
- S5. Garza-Ortiz, A., Maheswari, P. U., Lutz, M., Siegler, M. A., Reedijk, J. Tuning the cytotoxic properties of new ruthenium(III) and ruthenium(II) complexes with a modified bis(arylimino)pyridine Schiff base ligand using bidentate pyridine-based ligands. *J. Biol. Inorg. Chem.* **2014**, *19*, 675–689.
- S6. Garza-Ortiz, A., Maheswari, P. U., Siegler, M., Spek, A. L. Reedijk, J. Ruthenium(III) Chloride Complex with a Tridentate Bis(arylimino)pyridine Ligand: Synthesis, Spectrum, X-ray Structure, 9-Ethylguanine Binding Pattern, and In Vitro Cytotoxicity. *Inorg. Chem.* **2008**, *47*, 6964–6973.
- S7. Dutta, M., Das, K., Prathapa, S. J., Srivastava, H. K., Kumar, A. Selective and high yield transformation of glycerol to lactic acid using NNN pincer ruthenium catalysts. *Chem. Commun.* **2020**, *56*, 9886–9889.
